# Supplementary material for: Effectiveness of Mantra-Based Meditation on Mental Health: A Systematic Review and Meta-Analysis
Source: MDPI journal article supplement (doi:10.3390/ijerph19063380), 2022-03-13

## Subgroup analysis for Anxiety: Meditation versus control group

Figure S5: Type of control used

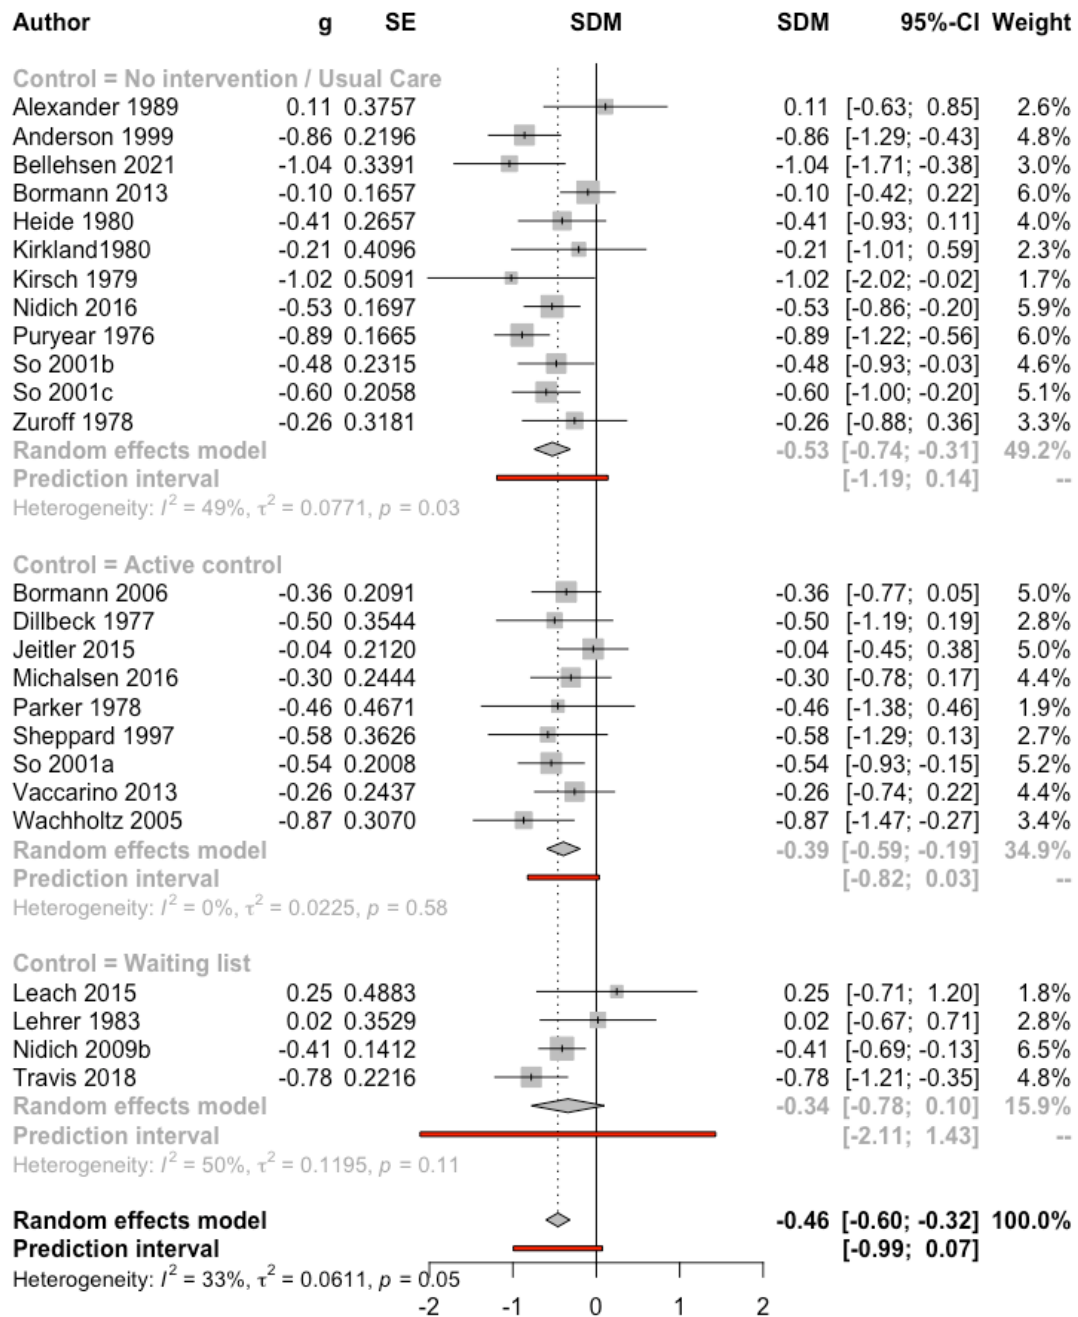

**Figure S6: Type of population**

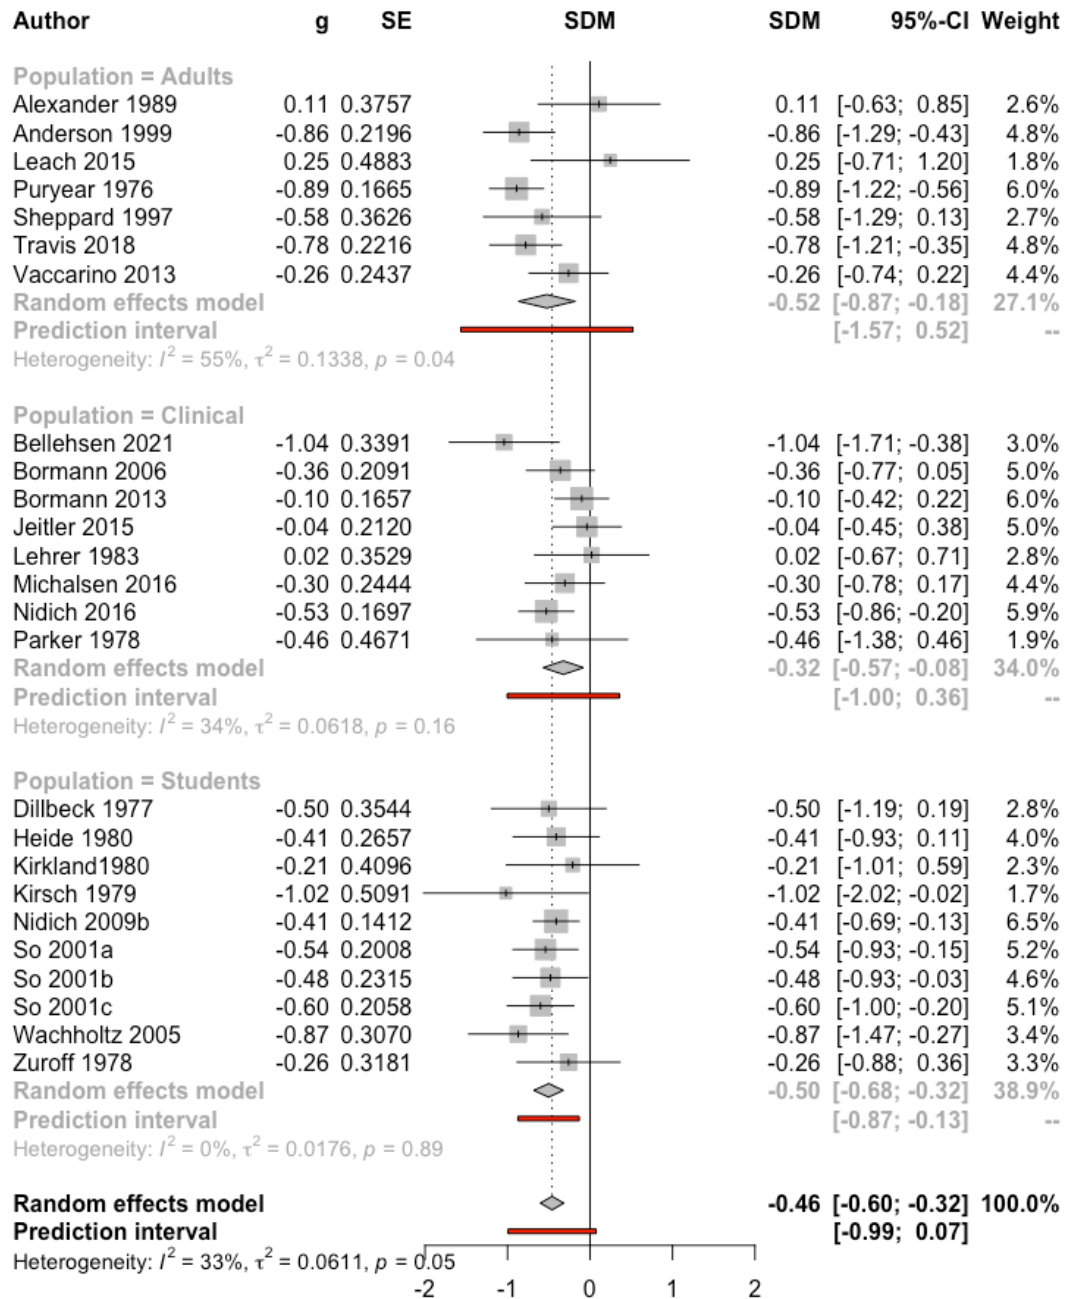

**Figure S7: Year of publication**

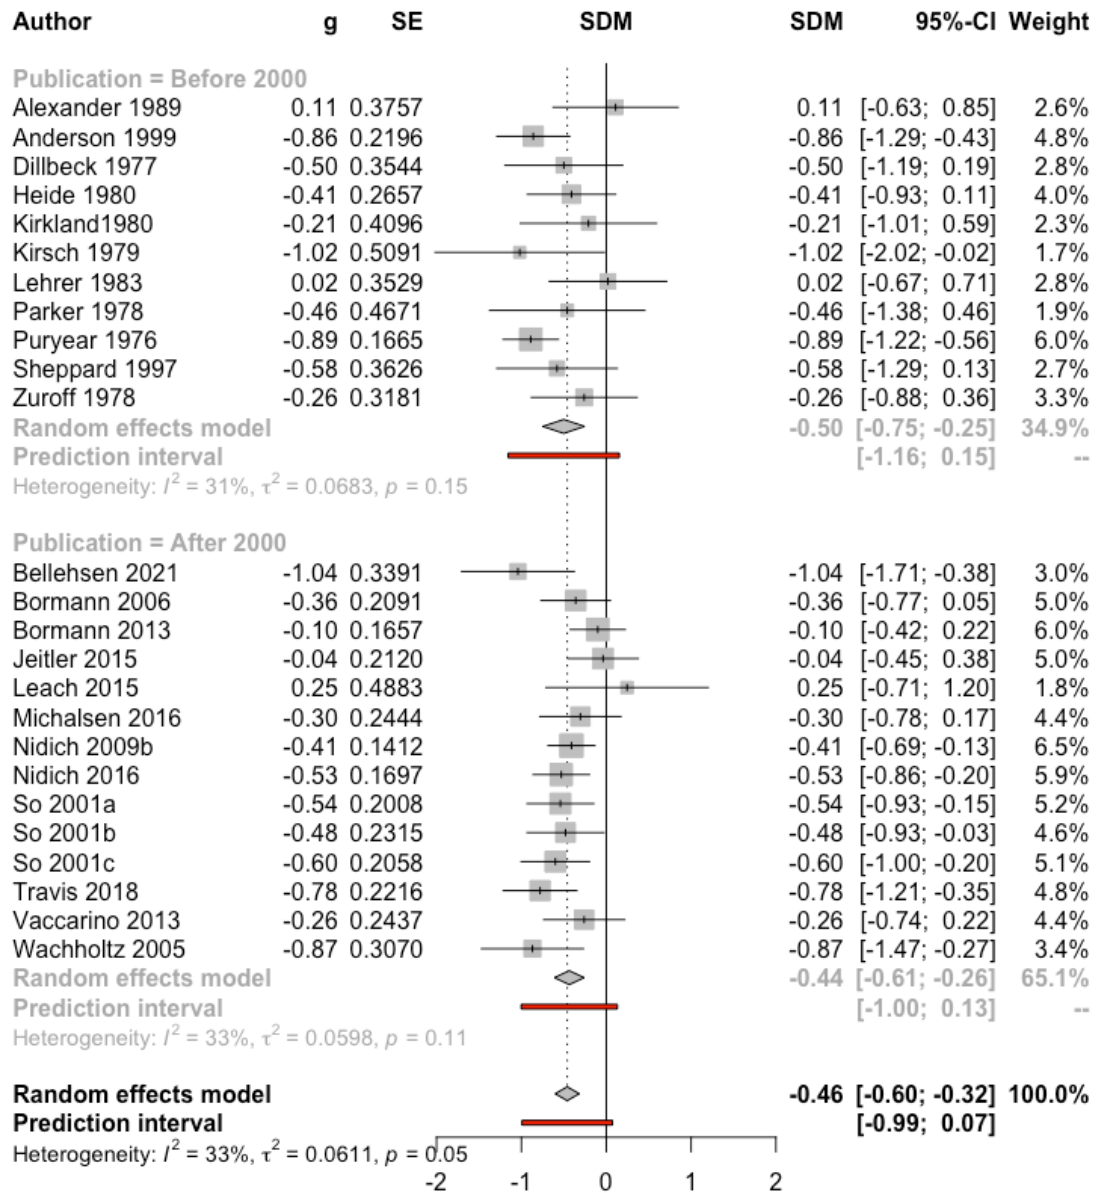

**Figure S8: Length of follow up**

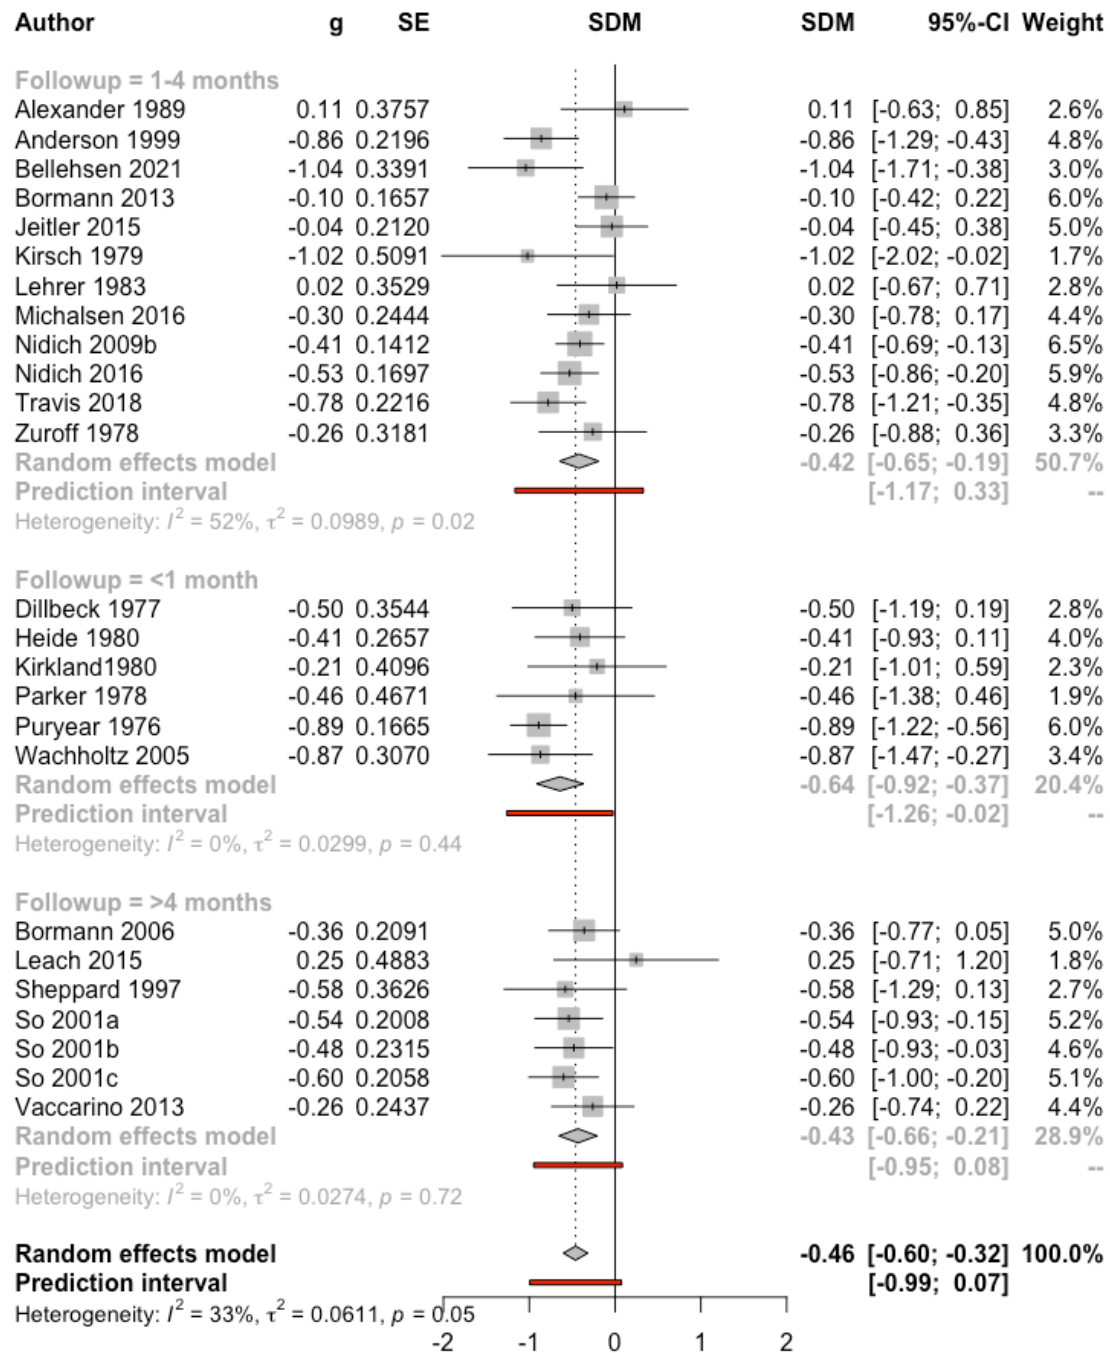

Supplement: s1 [file s1]
