# Supplementary material for: Effectiveness of Mantra-Based Meditation on Mental Health: A Systematic Review and Meta-Analysis
Source: MDPI journal article supplement (doi:10.3390/ijerph19063380), 2022-03-13
Supplement: s1 [file s1]

**Table S2 Search strategy**

| <b>Medline (Ovid)</b> |                                                                                                                                                                                                                                                          |
|-----------------------|----------------------------------------------------------------------------------------------------------------------------------------------------------------------------------------------------------------------------------------------------------|
| 1                     | Meditation/mt [Methods]                                                                                                                                                                                                                                  |
| 2                     | meditation*.ti,kw.                                                                                                                                                                                                                                       |
| 3                     | (Kindness-based or Kindness based or Kindnessbased or KBM or Loving-kindness or Loving kindness or Lovingkindness or compassion* or mind-training* or mind training*).ti.                                                                                |
| 4                     | ((Kindness-based or Kindness based or Kindnessbased or KBM or Loving-kindness or Loving kindness or Lovingkindness or compassion* or mind-training* or mind training*) adj2 (meditation* or therap* or treatment* or intervention* or training*)).ti,ab. |
| 5                     | compassion.kw.                                                                                                                                                                                                                                           |
| 6                     | (meditation* adj2 (training* or program*)).ti,ab.                                                                                                                                                                                                        |
| 7                     | ((Focused attention or Mantra or Yantra or Breath or Transcendental or Zazen or Tonglen or Dzogchen or Metta) adj2 (meditation* or therap* or treatment* or intervention* or training*)).ti,ab.                                                          |
| 8                     | 1 or 2 or 3 or 4 or 5 or 6 or 7                                                                                                                                                                                                                          |
| 9                     | Randomized Controlled Trials as Topic/                                                                                                                                                                                                                   |
| 10                    | randomized controlled trial/                                                                                                                                                                                                                             |
| 11                    | Random Allocation/                                                                                                                                                                                                                                       |
| 12                    | Double Blind Method/                                                                                                                                                                                                                                     |
| 13                    | Single Blind Method/                                                                                                                                                                                                                                     |
| 14                    | clinical trial/                                                                                                                                                                                                                                          |
| 15                    | clinical trial, phase i.pt.                                                                                                                                                                                                                              |
| 16                    | clinical trial, phase ii.pt.                                                                                                                                                                                                                             |
| 17                    | clinical trial, phase iii.pt.                                                                                                                                                                                                                            |
| 18                    | clinical trial, phase iv.pt.                                                                                                                                                                                                                             |
| 19                    | controlled clinical trial.pt.                                                                                                                                                                                                                            |
| 20                    | randomized controlled trial.pt.                                                                                                                                                                                                                          |
| 21                    | multicenter study.pt.                                                                                                                                                                                                                                    |
| 22                    | clinical trial.pt.                                                                                                                                                                                                                                       |
| 23                    | exp Clinical Trials as topic/                                                                                                                                                                                                                            |
| 24                    | or/9-23                                                                                                                                                                                                                                                  |
| 25                    | (clinical adj trial\$.tw.                                                                                                                                                                                                                                |
| 26                    | ((singl\$ or doubl\$ or treb\$ or tripl\$) adj (blind\$3 or mask\$3)).tw.                                                                                                                                                                                |
| 27                    | PLACEBOS/                                                                                                                                                                                                                                                |
| 28                    | placebo\$.tw.                                                                                                                                                                                                                                            |
| 29                    | randomly allocated.tw.                                                                                                                                                                                                                                   |
| 30                    | (allocated adj2 random\$.tw.                                                                                                                                                                                                                             |
| 31                    | or/25-30                                                                                                                                                                                                                                                 |
| 32                    | 24 or 31                                                                                                                                                                                                                                                 |
| 33                    | case report.tw.                                                                                                                                                                                                                                          |
| 34                    | letter/                                                                                                                                                                                                                                                  |
| 35                    | historical article/                                                                                                                                                                                                                                      |
| 36                    | or/33-35                                                                                                                                                                                                                                                 |
| 37                    | 32 not 36                                                                                                                                                                                                                                                |
| 38                    | 8 and 37                                                                                                                                                                                                                                                 |
| 39                    | systematic\$ review\$.ti,ab.                                                                                                                                                                                                                             |
| 40                    | meta-analysis as topic/                                                                                                                                                                                                                                  |
| 41                    | meta-analytic\$.ti,ab.                                                                                                                                                                                                                                   |
| 42                    | meta-analysis.ti,ab.pt.                                                                                                                                                                                                                                  |
| 43                    | metanalysis.ti,ab.                                                                                                                                                                                                                                       |
| 44                    | metaanalysis.ti,ab.                                                                                                                                                                                                                                      |
| 45                    | meta analysis.ti,ab.                                                                                                                                                                                                                                     |
| 46                    | meta-synthesis.ti,ab.                                                                                                                                                                                                                                    |
| 47                    | metasynthesis.ti,ab.                                                                                                                                                                                                                                     |
| 48                    | meta synthesis.ti,ab.                                                                                                                                                                                                                                    |
| 49                    | meta-regression.ti,ab.                                                                                                                                                                                                                                   |
| 50                    | metaregression.ti,ab.                                                                                                                                                                                                                                    |
| 51                    | meta regression.ti,ab.                                                                                                                                                                                                                                   |
| 52                    | (synthes\$ adj3 literature).ti,ab.                                                                                                                                                                                                                       |
| 53                    | (synthes\$ adj3 evidence).ti,ab.                                                                                                                                                                                                                         |
| 54                    | integrative review.ti,ab.                                                                                                                                                                                                                                |
| 55                    | data synthesis.ti,ab.                                                                                                                                                                                                                                    |
| 56                    | (research synthesis or narrative synthesis).ti,ab.                                                                                                                                                                                                       |
| 57                    | (systematic study or systematic studies).ti,ab.                                                                                                                                                                                                          |
| 58                    | (systematic comparison\$ or systematic overview\$).ti,ab.                                                                                                                                                                                                |
| 59                    | evidence based review.ti,ab.                                                                                                                                                                                                                             |
| 60                    | comprehensive review.ti,ab.                                                                                                                                                                                                                              |
| 61                    | critical review.ti,ab.                                                                                                                                                                                                                                   |
| 62                    | quantitative review.ti,ab.                                                                                                                                                                                                                               |

63 structured review.ti.ab.  
 64 realist review.ti.ab.  
 65 realist synthesis.ti.ab.  
 66 or/39-65  
 67 review.pt.  
 68 medline.ab.  
 69 pubmed.ab.  
 70 cochrane.ab.  
 71 embase.ab.  
 72 cinahl.ab.  
 73 psyc?lit.ab.  
 74 psyc?info.ab.  
 75 (literature adj3 search\$).ab.  
 76 (database\$ adj3 search\$).ab.  
 77 (bibliographic adj3 search\$).ab.  
 78 (electronic adj3 search\$).ab.  
 79 (electronic adj3 database\$).ab.  
 80 (computeri?ed adj3 search\$).ab.  
 81 (internet adj3 search\$).ab.  
 82 included studies.ab.  
 83 (inclusion adj3 studies).ab.  
 84 inclusion criteria.ab.  
 85 selection criteria.ab.  
 86 predefined criteria.ab.  
 87 predetermined criteria.ab.  
 88 (assess\$ adj3 (quality or validity)).ab.  
 89 (select\$ adj3 (study or studies)).ab.  
 90 (data adj3 extract\$).ab.  
 91 extracted data.ab.  
 92 (data adj2 abstracted).ab.  
 93 (data adj3 abstraction).ab.  
 94 published intervention\$.ab.  
 95 ((study or studies) adj2 evaluat\$).ab.  
 96 (intervention\$ adj2 evaluat\$).ab.  
 97 confidence interval\$.ab.  
 98 heterogeneity.ab.  
 99 pooled.ab.  
 100 pooling.ab.  
 101 odds ratio\$.ab.  
 102 (Jadad or coding).ab.  
 103 or/68-102  
 104 67 and 103  
 105 review.ti.  
 106 105 and 103  
 107 (review\$ adj4 (papers or trials or studies or evidence or intervention\$ or evaluation\$)).ti.ab.  
 108 66 or 104 or 106 or 107  
 109 letter.pt.  
 110 editorial.pt.  
 111 comment.pt.  
 112 109 or 110 or 111  
 113 108 not 112  
 114 exp animals/ not humans/  
 115 113 not 114  
 116 8 and 115

---

**Embase (Elsevier)**

---

139 #8 AND #137  
 138 #8 AND #38  
 137 #135 NOT #136  
 136 'conference abstract':it  
 135 #133 NOT #134  
 134 'cochrane database of systematic reviews\*:jt OR 'the cochrane database of systematic reviews':jt  
 133 #131 NOT #132  
 132 ('animal' OR 'nonhuman') NOT 'human'/exp  
 131 #127 NOT #130  
 130 #128 OR #129  
 129 'editorial':it  
 128 letter:it  
 127 #82 OR #122 OR #124 OR #125 OR #126

---

---

|     |                                                                                                          |
|-----|----------------------------------------------------------------------------------------------------------|
| 126 | (retriev* NEAR/10                                                                                        |
|     | (papers OR trials OR studies OR evidence OR intervention* OR evaluation* OR outcome* OR findings)):ti,ab |
| 125 | (review* NEAR/10 (papers OR trials OR 'trial                                                             |
|     | data' OR studies OR evidence OR intervention* OR evaluation* OR outcome* OR findings)):ti,ab             |
| 124 | #120 AND #123                                                                                            |
| 123 | review:ti                                                                                                |
| 122 | #120 AND #121                                                                                            |
| 121 | review:it                                                                                                |
|     | #83 OR #84 OR #85 OR #86 OR #87 OR #88 OR #89 OR #90 OR #91 OR #92 OR #93 OR #94 OR #95 OR #96 OR #      |
| 120 | 97 OR #98 OR #99 OR #100 OR #101 OR #102 OR #103 OR #104 OR #105 OR #106 OR #107 OR #108 OR #109 O       |
|     | R #110 OR #111 OR #112 OR #113 OR #114 OR #115 OR #116 OR #117 OR #118 OR #119                           |
| 119 | 'evidence-based':ti,ab                                                                                   |
| 118 | jadad:ab OR coding:ab                                                                                    |
| 117 | 'odds ratio*':ab                                                                                         |
| 116 | pooling:ab                                                                                               |
| 115 | pooled:ab                                                                                                |
| 114 | heterogeneity:ab                                                                                         |
| 113 | 'confidence interval*':ab                                                                                |
| 112 | (intervention* NEAR/2 evaluat*):ab                                                                       |
| 111 | ((study OR studies) NEAR/2 evaluat*):ab                                                                  |
| 110 | 'published intervention*':ab                                                                             |
| 109 | (data NEAR/2 abstraction):ab                                                                             |
| 108 | (data NEAR/2 abstracted):ab                                                                              |
| 107 | 'extracted data':ab                                                                                      |
| 106 | (data NEAR/3 extract*):ab                                                                                |
| 105 | ('select*' NEAR/3 (study OR studies)):ab                                                                 |
| 104 | ('assess*' NEAR/3 (quality OR validity)):ab                                                              |
| 103 | 'predetermined criteria':ab                                                                              |
| 102 | 'predefined criteria':ab                                                                                 |
| 101 | 'selection criteria':ab                                                                                  |
| 100 | 'inclusion criteria':ab                                                                                  |
| 99  | ('inclusion' NEAR/3 'studies'):ab                                                                        |
| 98  | 'included studies':ab                                                                                    |
| 97  | (internet NEAR/3 search*):ab                                                                             |
| 96  | (computeri*ed NEAR/3 search*):ab                                                                         |
| 95  | ('electronic' NEAR/3 'database*'):ab                                                                     |
| 94  | ('electronic' NEAR/3 'search*'):ab                                                                       |
| 93  | ('bibliographic' NEAR/3 'search*'):ab                                                                    |
| 92  | ('database*' NEAR/3 'search*'):ab                                                                        |
| 91  | ('literature' NEAR/3 'search*'):ab                                                                       |
| 90  | lilacs:ab                                                                                                |
| 89  | psyc*info:ab                                                                                             |
| 88  | psyc*lit:ab                                                                                              |
| 87  | cinahl:ab                                                                                                |
| 86  | embase:ab                                                                                                |
| 85  | cochrane:ab                                                                                              |
| 84  | pubmed:ab                                                                                                |
| 83  | medline:ab                                                                                               |
|     | #39 OR #40 OR #41 OR #42 OR #43 OR #44 OR #45 OR #46 OR #47 OR #48 OR #49 OR #50 OR #51 OR #52 OR #      |
| 82  | 53 OR #54 OR #55 OR #56 OR #57 OR #58 OR #59 OR #60 OR #61 OR #62 OR #63 OR #64 OR #65 OR #66 OR #6      |
|     | 7 OR #68 OR #69 OR #70 OR #71 OR #72 OR #73 OR #74 OR #75 OR #76 OR #77 OR #78 OR #79 OR #80 OR #81      |
| 81  | ('search' NEAR/1 (strateg* OR term*)):ti,ab                                                              |
| 80  | 'medline':ti,ab AND (('inclusion' NEAR/3 'criteria'):ti,ab)                                              |
| 79  | ('pooled data' NEAR/6 (studies OR trials)):ti,ab                                                         |
| 78  | ('pooled' NEAR/2 'analysis'):ti,ab                                                                       |
| 77  | 'realist synthesis':ti,ab                                                                                |
| 76  | 'realist review':ti,ab                                                                                   |
| 75  | 'structured review':ti,ab                                                                                |
| 74  | 'quantitative review':ti,ab                                                                              |
| 73  | 'critical analysis':ti,ab                                                                                |
| 72  | 'critical review':ti,ab                                                                                  |
| 71  | 'comprehensive review':ti,ab                                                                             |
| 70  | ('evidence-based' NEAR/2 'review'):ti,ab                                                                 |
| 69  | ('literature review' NEAR/2 'adverse event*'):ti,ab                                                      |
| 68  | ('literature review' NEAR/2 'adverse effect*'):ti,ab                                                     |
| 67  | ('literature review' NEAR/2 'side effect*'):ti,ab                                                        |
| 66  | (review NEAR/3 'scientific literature'):ti,ab                                                            |

---

---

|    |                                                                                                                                                                                            |
|----|--------------------------------------------------------------------------------------------------------------------------------------------------------------------------------------------|
| 65 | 'systematic* literature research*':ti,ab                                                                                                                                                   |
| 64 | (systematic NEAR/2 search*):ti,ab                                                                                                                                                          |
| 63 | 'systematic comparison*':ti,ab OR 'systematic overview*':ti,ab                                                                                                                             |
| 62 | 'systematic study':ti,ab OR 'systematic studies':ti,ab                                                                                                                                     |
| 61 | 'research synthesis':ti,ab OR 'narrative synthesis':ti,ab                                                                                                                                  |
| 60 | 'data synthesis':ti,ab                                                                                                                                                                     |
| 59 | 'integrative review':ti,ab                                                                                                                                                                 |
| 58 | (synthes* NEAR/2 qualitative):ti,ab                                                                                                                                                        |
| 57 | (synthes* NEAR/3 evidence):ti,ab                                                                                                                                                           |
| 56 | (synthes* NEAR/3 literature):ti,ab                                                                                                                                                         |
| 55 | 'meta regression':ti,ab                                                                                                                                                                    |
| 54 | 'metaregression':ti,ab                                                                                                                                                                     |
| 53 | 'meta-regression':ti,ab                                                                                                                                                                    |
| 52 | 'meta synthesis':ti,ab                                                                                                                                                                     |
| 51 | 'metasynthesis':ti,ab                                                                                                                                                                      |
| 50 | 'meta-synthesis':ti,ab                                                                                                                                                                     |
| 49 | 'meta analysis':ti,ab                                                                                                                                                                      |
| 48 | 'metaanalysis':ti,ab                                                                                                                                                                       |
| 47 | 'metanalysis':ti,ab                                                                                                                                                                        |
| 46 | 'meta-analysis':ti,ab                                                                                                                                                                      |
| 45 | 'meta-analytic*':ti,ab                                                                                                                                                                     |
| 44 | 'meta analysis (topic)'                                                                                                                                                                    |
| 43 | 'meta analysis'                                                                                                                                                                            |
| 42 | 'systematic review (topic)'                                                                                                                                                                |
| 41 | 'systematic review'                                                                                                                                                                        |
| 40 | 'systematic* literature review*':ti,ab                                                                                                                                                     |
| 39 | 'systematic review':ti,ab                                                                                                                                                                  |
| 38 | #28 NOT #37                                                                                                                                                                                |
| 37 | #29 OR #30 OR #31 OR #32 OR #33 OR #34 OR #35 OR #36                                                                                                                                       |
| 36 | 'note'/it                                                                                                                                                                                  |
| 35 | 'editorial'/it                                                                                                                                                                             |
| 34 | 'conference proceeding'/it                                                                                                                                                                 |
| 33 | 'conference abstract'/it                                                                                                                                                                   |
| 32 | 'conference paper'/it                                                                                                                                                                      |
| 31 | 'abstract report'/de OR 'letter'/de                                                                                                                                                        |
| 30 | 'case report':ti,ab                                                                                                                                                                        |
| 29 | 'case study'/de                                                                                                                                                                            |
| 28 | #9 OR #10 OR #11 OR #12 OR #13 OR #14 OR #15 OR #16 OR #17 OR #18 OR #19 OR #20 OR #21 OR #22 OR #23 OR #24 OR #25 OR #26 OR #27                                                           |
| 27 | 'prospective study'/de                                                                                                                                                                     |
| 26 | placebo*:ti,ab                                                                                                                                                                             |
| 25 | ((treble OR triple) NEAR/1 blind*):ti,ab                                                                                                                                                   |
| 24 | 'double blind*':ti,ab                                                                                                                                                                      |
| 23 | 'single blind*':ti,ab                                                                                                                                                                      |
| 22 | (random* NEAR/2 allocat*):ti,ab                                                                                                                                                            |
| 21 | rct:ti,ab                                                                                                                                                                                  |
| 20 | 'randomi*ed controlled trial*':ti,ab                                                                                                                                                       |
| 19 | 'placebo'/de                                                                                                                                                                               |
| 18 | 'crossover procedure'/de                                                                                                                                                                   |
| 17 | 'double blind procedure'/de                                                                                                                                                                |
| 16 | 'single blind procedure'/de                                                                                                                                                                |
| 15 | 'randomization'/exp                                                                                                                                                                        |
| 14 | 'phase 4 clinical trial'/de                                                                                                                                                                |
| 13 | 'phase 3 clinical trial'/de                                                                                                                                                                |
| 12 | 'multicenter study'/de                                                                                                                                                                     |
| 11 | 'controlled clinical trial'/de                                                                                                                                                             |
| 10 | 'randomized controlled trial'/de                                                                                                                                                           |
| 9  | 'clinical trial'/de                                                                                                                                                                        |
| 8  | #1 OR #2 OR #3 OR #4 OR #5 OR #6 OR #7<br>('focused                                                                                                                                        |
| 7  | attention' OR mantra OR yantra OR breath OR transcendental OR zazen OR tonglen OR dzogchen OR metta) NEAR/2<br>(meditation* OR therap* OR treatment* OR intervention* OR training*)):ti,ab |
| 6  | (meditation* NEAR/2 (training* OR program*)):ti,ab                                                                                                                                         |
| 5  | compassion:kw<br>(('kindness-based' OR 'kindness based' OR kindnessbased OR kbm OR 'loving-kindness' OR 'loving                                                                            |
| 4  | kindness' OR lovingkindness OR compassion* OR 'mind-training*' OR 'mind training*') NEAR/2<br>(meditation* OR therap* OR treatment* OR intervention* OR training*)):ti,ab                  |

---

|   |                                                                                                                                                                                                                        |
|---|------------------------------------------------------------------------------------------------------------------------------------------------------------------------------------------------------------------------|
| 3 | ('kindness-based':ti OR 'kindness based':ti OR 'kindnessbased':ti OR kbm:ti OR 'loving-kindness':ti OR 'loving kindness':ti OR lovingkindness:ti OR compassion*:ti OR 'mind training*':ti OR mind:ti) AND training*:ti |
| 2 | 'meditation':ti,kw                                                                                                                                                                                                     |
| 1 | 'meditation'/mj                                                                                                                                                                                                        |

---

#### Cochrane Library (Wiley)

---

|   |                                                                                                                                                                                                                                                                        |
|---|------------------------------------------------------------------------------------------------------------------------------------------------------------------------------------------------------------------------------------------------------------------------|
| 1 | MeSH descriptor: [Meditation] this term only                                                                                                                                                                                                                           |
| 2 | meditation:ti                                                                                                                                                                                                                                                          |
| 3 | (Kindness-based or Kindness based or Kindnessbased or KBM or Loving-kindness or Loving kindness or Lovingkindness or compassion* or mind-training* or mind training*):ti                                                                                               |
| 4 | ((("Kindness-based" or "Kindness based" or Kindnessbased or KBM or "Loving-kindness" or "Loving kindness" or Lovingkindness or compassion* or "mind-training*" or "mind training*") near/2 (meditation* or therap* or treatment* or intervention* or training*)):ti,ab |
| 5 | compassion*:kw                                                                                                                                                                                                                                                         |
| 6 | (meditation* near/2 (training* or program*)):ti,ab                                                                                                                                                                                                                     |
| 7 | ((("Focused attention" or Mantra or Yantra or Breath or Transcendental or Zazen or Tonglen or Dzogchen or Metta) near/2 (meditation* or therap* or treatment* or intervention* or training*)):ti,ab                                                                    |
| 8 | #1 or #2 or #3 or #4 or #5 or #6 or #7                                                                                                                                                                                                                                 |

---

#### PsicINFO (Ebsco)

---

|   |                                                                                                                                                                                                                                                                                                                                                                                                                                                                                                                                     |
|---|-------------------------------------------------------------------------------------------------------------------------------------------------------------------------------------------------------------------------------------------------------------------------------------------------------------------------------------------------------------------------------------------------------------------------------------------------------------------------------------------------------------------------------------|
| 9 | S7 AND S8                                                                                                                                                                                                                                                                                                                                                                                                                                                                                                                           |
|   | MM "Clinical trials" OR MR ("Treatment Effectiveness Evaluation") OR TI ((randomi?ed n7 trial*) or ((single or doubl* or tripl* or treb*) and (blind* or mask*)) or (controlled n3 trial*) or (clinical n2 trial*)) OR AB ((randomi?ed n7 trial*) or ((single or doubl* or tripl* or treb*) and (blind* or mask*)) or (controlled n3 trial*) or (clinical n2 trial*))                                                                                                                                                               |
| 8 | ((single or doubl* or tripl* or treb*) and (blind* or mask*)) or (controlled n3 trial*) or (clinical n2 trial*)) OR KW ((randomi?ed n7 trial*) or ((single or doubl* or tripl* or treb*) and (blind* or mask*)) or (controlled n3 trial*) or (clinical n2 trial*))                                                                                                                                                                                                                                                                  |
| 7 | S1 OR S2 OR S3 OR S4 OR S5 OR S6                                                                                                                                                                                                                                                                                                                                                                                                                                                                                                    |
|   | TI ( ((Focused attention or Mantra or Yantra or Breath or Transcendental or Zazen or Tonglen or Dzogchen or Metta) N2 (meditation* or therap* or treatment* or intervention* or training*)) ) OR AB ( ((Focused attention or Mantra or Yantra or Breath or Transcendental or Zazen or Tonglen or Dzogchen or Metta) N2 (meditation* or therap* or treatment* or intervention* or training*)) )                                                                                                                                      |
| 6 | Breath or Transcendental or Zazen or Tonglen or Dzogchen or Metta) N2 (meditation* or therap* or treatment* or intervention* or training*)) )                                                                                                                                                                                                                                                                                                                                                                                       |
| 5 | TI (meditation* N2 (training* or program*)) OR AB (meditation* N2 (training* or program*))                                                                                                                                                                                                                                                                                                                                                                                                                                          |
| 4 | KW compassion*                                                                                                                                                                                                                                                                                                                                                                                                                                                                                                                      |
| 3 | DE "Meditation" or TI meditation* or KW meditation*                                                                                                                                                                                                                                                                                                                                                                                                                                                                                 |
|   | TI ( ((Kindness-based or Kindness based or Kindnessbased or KBM or Loving-kindness or Loving kindness or Lovingkindness or compassion* OR mind-training* or mind training*) N2 (meditation* or therap* or treatment* or intervention* or training*)) ) OR AB ( ((Kindness-based or Kindness based or Kindnessbased or KBM or Loving-kindness or Loving kindness or Lovingkindness or compassion* OR mind-training* or mind training*) N2 (meditation* or therap* or treatment* or intervention* or training*)) )                    |
| 2 | TI ( Kindness-based or Kindness based or Kindnessbased or KBM or Loving-kindness or Loving kindness or Lovingkindness or compassion* OR mind-training* or mind training*) OR AB ( Kindness-based or Kindness based or Kindnessbased or KBM or Loving-kindness or Loving kindness or Lovingkindness or compassion* OR mind-training* or mind training*) OR KW ( Kindness-based or Kindness based or Kindnessbased or KBM or Loving-kindness or Loving kindness or Lovingkindness or compassion* OR mind-training* or mind training*) |
| 1 | Kindnessbased or KBM or Loving-kindness or Loving kindness or Lovingkindness or compassion* OR mind-training* or mind training* ) OR KW ( Kindness-based or Kindness based or Kindnessbased or KBM or Loving-kindness or Loving kindness or Lovingkindness or compassion* OR mind-training* or mind training* )                                                                                                                                                                                                                     |

---
