# Supplementary material for: Effectiveness of Mantra-Based Meditation on Mental Health: A Systematic Review and Meta-Analysis
Source: MDPI journal article supplement (doi:10.3390/ijerph19063380), 2022-03-13
Supplement: s1 [file s1]

**Table S4 Methodological quality of included studies (Risk of bias)**

| TRANSCENDENTAL MEDITATION      |          |          |          |          |          |                      |
|--------------------------------|----------|----------|----------|----------|----------|----------------------|
| Study                          | Domain 1 | Domain 2 | Domain 3 | Domain 4 | Domain 5 | Overall risk of bias |
| Alexander (1989)               | SC       | High     | Low      | Low      | SC       | High                 |
| Bellehsen (2021)               | Low      | SC       | Low      | Low      | SC       | SC                   |
| <i>Hetero-reported measure</i> | Low      | SC       | Low      | High     | SC       | High                 |
| <i>Self-reported measure</i>   |          |          |          |          |          |                      |
| Bokhari (2019)                 | SC       | High     | High     | High     | Low      | High                 |
| Brooks (1985)                  | SC       | High     | Low      | SC       | SC       | High                 |
| Chhatre (2013)                 | SC       | SC       | Low      | SC       | SC       | High                 |
| Dillbeck (1977)                | SC       | High     | Low      | SC       | SC       | High                 |
| Elder (2014)                   | Low      | SC       | High     | High     | SC       | High                 |
| Heffner (2016)                 | SC       | High     | High     | High     | SC       | High                 |
| <i>Hetero-reported measure</i> | SC       | High     | High     | High     | SC       | High                 |
| <i>Self-reported measure</i>   |          |          |          |          |          |                      |
| Jayadevappa (2007)             | Low      | SC       | Low      | SC       | SC       | High                 |
| Jong (2019)                    | SC       | SC       | Low      | SC       | Low      | High                 |
| Leach (2015)                   | Low      | SC       | Low      | Low      | Low      | SC                   |
| Nidich (2009a)                 | Low      | High     | High     | High     | SC       | High                 |
| Nidich (2009b)                 | Low      | High     | SC       | High     | SC       | High                 |
| Nidich (2016)                  | SC       | SC       | Low      | High     | SC       | High                 |
| Nidich (2017)                  | SC       | SC       | Low      | High     | SC       | High                 |
| Nidich (2018)                  | SC       | SC       | SC       | Low      | SC       | High                 |
| <i>Hetero-reported measure</i> | SC       | SC       | SC       | SC       | SC       | High                 |
| <i>Self-reported measure</i>   |          |          |          |          |          |                      |
| Ottens (1975)                  | SC       | SC       | Low      | SC       | SC       | High                 |
| Raskin (1980)                  | SC       | SC       | High     | SC       | SC       | High                 |
| Rees (2013)                    | High     | SC       | Low      | High     | SC       | High                 |
| Schneider (2012)               | Low      | SC       | SC       | SC       | SC       | High                 |
| Sheppard (1997)                | SC       | High     | Low      | SC       | SC       | High                 |
| So (2001)                      |          |          |          |          |          |                      |
| <i>Substudy 1</i>              | SC       | High     | SC       | SC       |          | High                 |
| <i>Substudy 2</i>              | SC       | High     | SC       | SC       | SC       | High                 |
| <i>Substudy 3</i>              | SC       | High     | Low      | SC       | SC       | High                 |

|                                |          |          |          |          |          |                      |
|--------------------------------|----------|----------|----------|----------|----------|----------------------|
| Tuab (1994)                    | SC       | High     | Low      | SC       | SC       | High                 |
| Travis (2018)                  | SC       | High     | Low      | Low      | SC       | SC                   |
| Zuroff (1978)                  |          |          |          |          |          |                      |
| <i>Hetero-reported measure</i> | SC       | SC       | Low      | SC       | SC       | High                 |
| <i>Self-reported measure</i>   | SC       | SC       | Low      | SC       | SC       | High                 |
| MANTRAS-BASED MEDITATIONS      |          |          |          |          |          |                      |
| Domain RoB                     |          |          |          |          |          |                      |
| Study                          | Domain 1 | Domain 2 | Domain 3 | Domain 4 | Domain 5 | Overall risk of bias |
| Anderson (1999)                | SC       | High     | High     | High     | SC       | High                 |
| Bormann (2006)                 | SC       | High     | Low      | SC       | SC       | High                 |
| Bormann (2008)                 | SC       | SC       |          |          |          |                      |
| <i>Hetero-reported measure</i> | SC       | SC       | Low      | Low      | SC       | High                 |
| <i>Self-reported measure</i>   |          |          | Low      | SC       | SC       | High                 |
| Bormann (2013)                 |          |          |          |          |          |                      |
| <i>Hetero-reported measure</i> | Low      | SC       | Low      | Low      | Low      | SC                   |
| <i>Self-reported measure</i>   | Low      | SC       | Low      | High     | Low      | High                 |
| Bormann (2018)                 |          |          |          |          |          |                      |
| <i>Hetero-reported measure</i> | Low      | SC       | Low      | Low      | Low      | SC                   |
| <i>Self-reported measure</i>   | Low      | SC       | Low      | SC       | Low      | SC                   |
| Boswell (1979)                 | SC       | High     | High     | SC       | SC       | High                 |
| Dunne (2019)                   | SC       | SC       | Low      | Low      | Low      | SC                   |
| Heide (1980)                   | SC       | High     | High     | High     | SC       | High                 |
| Jeitler (2015)                 | Low      | SC       | Low      | SC       | Low      | SC                   |
| Kirkland (1980)                | SC       | High     | SC       | SC       | SC       | High                 |
| Kirsch (1979)                  | SC       | High     | High     | High     | SC       | High                 |
| Lehrer (1983)                  | SC       | High     | High     | SC       | SC       | High                 |
| Manocha (2011)                 | Low      | SC       | SC       | SC       | SC       | High                 |
| Michalsen (2016))              | Low      | SC       | Low      | SC       | Low      | SC                   |
| Murphy (1986)                  | SC       | High     | High     | SC       | SC       | High                 |
| Oman (2006)                    | Low      | SC       | Low      | High     | SC       | High                 |
| Parker (1978)                  | SC       | High     | High     | SC       | SC       | High                 |
| Puryear (1976)                 | SC       | High     | High     | High     | SC       | High                 |
| Severtsen (1986)               | High     | High     | Low      | SC       | SC       | High                 |
| Vaccarino (2013)               | Low      | Low      | Low      | Low      | SC       | SC                   |
| Vasudev (2016)                 |          |          |          |          |          |                      |
| Ionson (2019)                  | Low      | SC       | Low      | High     | Low      | High                 |
| Wachholtz (2005)               | SC       | SC       | Low      | SC       | SC       | High                 |

|                  |     |      |      |    |    |             |
|------------------|-----|------|------|----|----|-------------|
| Wachholtz (2008) | Low | SC   | High | SC | SC | <b>High</b> |
| Wolf (2003)      | SC  | High | SC   | SC | SC | <b>High</b> |

**MIXED MEDITATIONS**

| Study          | Domain RoB |          |          |          |          | Overall risk of bias |
|----------------|------------|----------|----------|----------|----------|----------------------|
|                | Domain 1   | Domain 2 | Domain 3 | Domain 4 | Domain 5 |                      |
| Milbury (2013) | SC         | SC       | Low      | High     | Low      | <b>High</b>          |
| Wu (2019)      | Low        | SC       | Low      | High     | SC       | <b>High</b>          |

SC: Some concerns  
 RoB: Risk of bias  
 Domain 1: Risk of bias arising from the randomization process  
 Domain 2: Risk of bias due to deviations from the intended interventions  
 Domain 3: Risk of bias due to missing outcome data  
 Domain 4: Risk of bias in measurement of the outcome  
 Domain 5: Risk of bias in selection of the reported result
