# Supplementary material for: Effectiveness of Mantra-Based Meditation on Mental Health: A Systematic Review and Meta-Analysis
Source: MDPI journal article supplement (doi:10.3390/ijerph19063380), 2022-03-13

## Subgroup analysis for Mental quality of Life: Meditation versus control group

**Figure S18: Type of control used**

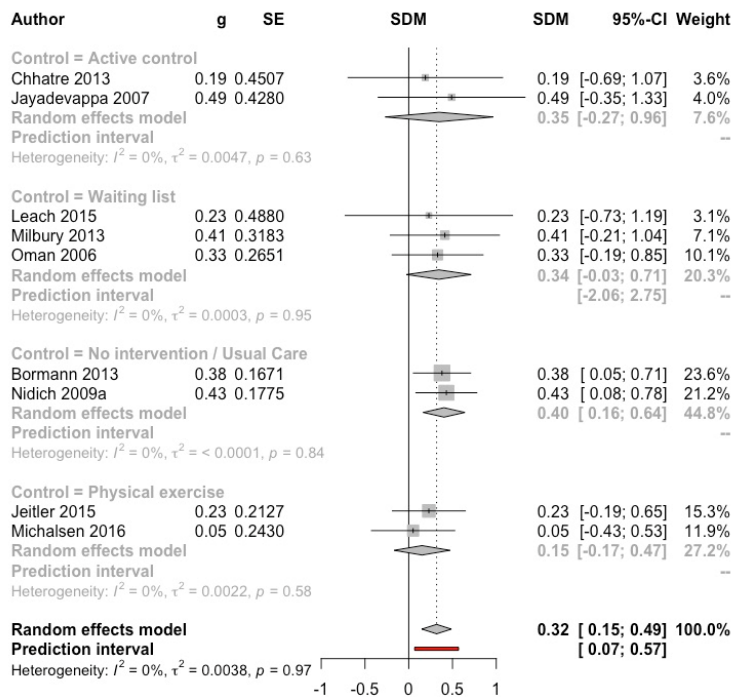

**Figure S19: Type of population**

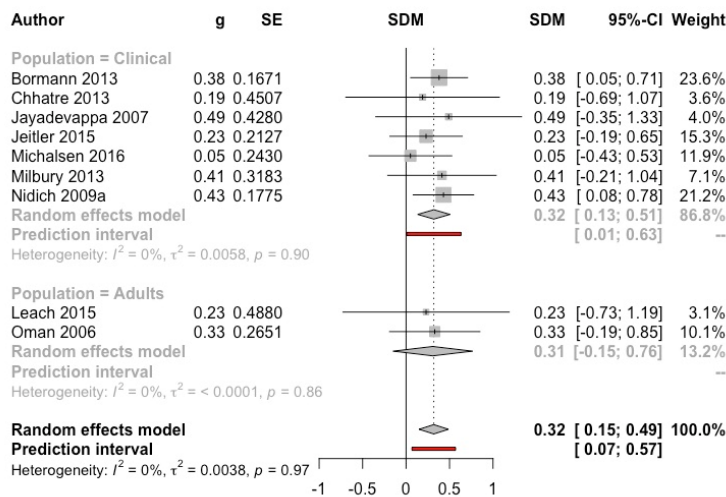

Figure S20: Length of follow up

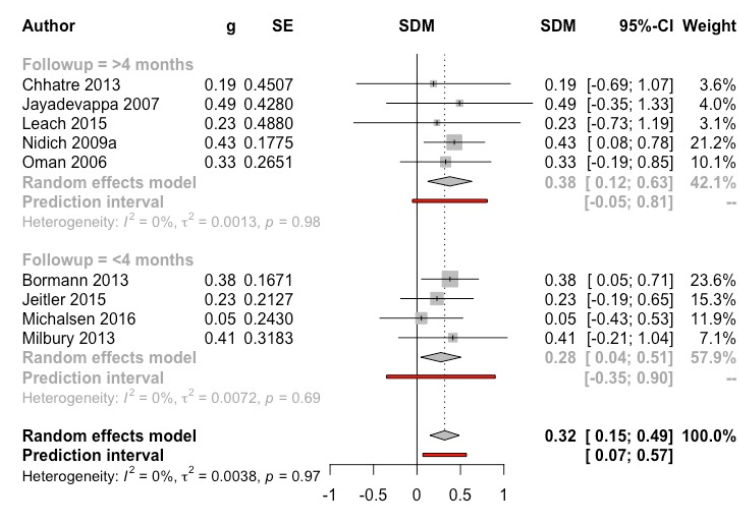

Supplement: s1 [file s1]
