# Supplementary material for: Effectiveness of Mantra-Based Meditation on Mental Health: A Systematic Review and Meta-Analysis
Source: MDPI journal article supplement (doi:10.3390/ijerph19063380), 2022-03-13
Supplement: s1 [file s1]

**Table S3 Characteristics of the included studies**

| TRANSCENDENTAL MEDITATION |                             |                                                             |                                                                                                                                                                  |                                                                                                             |                                           |                                                                            |
|---------------------------|-----------------------------|-------------------------------------------------------------|------------------------------------------------------------------------------------------------------------------------------------------------------------------|-------------------------------------------------------------------------------------------------------------|-------------------------------------------|----------------------------------------------------------------------------|
| Clinical population       |                             |                                                             |                                                                                                                                                                  |                                                                                                             |                                           |                                                                            |
| Author (year)             | Population                  | Sample                                                      | Intervention                                                                                                                                                     | Comparator                                                                                                  | Duration and follow-up                    | Outcomes                                                                   |
| Bellehsen (2021)          | Veterans with PTSD symptoms | n = 40 (randomized)<br>Mean age: 51.6 years<br>Females: 15% | 16 individual and group over 12 weeks + daily practice (20 minutes twice a day)                                                                                  | Usual care                                                                                                  | 12 weeks<br>No follow-up                  | Depression (BDI-II)<br>Anxiety (BAI)<br>Insomnia (ISI)                     |
| Bokhari (2019)            | Coronary heart disease      | n= 56 (randomized)<br>Mean age: 63 years<br>Females: 35%    | Individual and group sessions of 60-90 minutes for 6 days + 5 follow-up sessions                                                                                 | Cardiac rehabilitation + physical exercise<br>Cardiac rehabilitation + physical exercise + TM<br>Usual care | 12 weeks<br>No follow-up                  | Depression (BDI-II)<br>Psychopathology (GHQ)                               |
| Brooks (1985)             | Veterans with PTSD          | n = 18 (randomized)<br>Mean age: 33.3 years<br>Females: 0%  | One daily session of 90 minutes during 4 days and weekly sessions during 3 months + daily practice (twice a day for 20 minutes)                                  | Eclectic group psychotherapy                                                                                | 12 weeks<br>No follow-up                  | PTSD severity (interview DSM-III)<br>Anxiety (TMAS)<br>Depression (BDI-II) |
| Chhatre (2013)            | HIV-AIDS                    | n = 22 (randomized)<br>Mean age: 49.9 years<br>Females: 14% | 5 sessions of 120 minutes during 5 days + 9 booster sessions + daily practice (twice a day for 20 minutes)                                                       | Health education                                                                                            | 24 weeks<br>No follow-up                  | HRQOL (SF-36)<br>Depression (CES-D)<br>Perceived stress (PSS)              |
| Heffner (2016)            | Veterans with PTSD          | n = 70 (randomized)<br>Mean age: N.I.<br>Females: 10%       | TM: individual and group sessions of 15-30 minutes, twice a day during 5 days + 10 optional booster sessions.<br>MBM: group sessions of 90 minutes, once a week. | Present-centered group therapy                                                                              | 4 and 8 weeks<br>1- and 2-weeks follow-up | PTSD symptoms (CAPS, PCL-S)                                                |

|                    |                                          |                                                                |                                                                                                                                |                                                 |                               |                                                                       |
|--------------------|------------------------------------------|----------------------------------------------------------------|--------------------------------------------------------------------------------------------------------------------------------|-------------------------------------------------|-------------------------------|-----------------------------------------------------------------------|
| Jayadevappa (2007) | Congestive Heart Failure                 | n = 23 (randomized)<br>Mean age: 64.1 years<br>Females: 61%    | 7 individual and group sessions of 90 minutes during a week + daily practice (15-20 minutes, twice a day) + 9 booster sessions | Health education                                | 24 weeks<br>No follow-up      | HRQOL (SF-36)<br>Depression (CES-D)<br>Perceived stress (PSS)         |
| Jong (2019)        | Children with primary headaches          | n = 131 (randomized)<br>Mean age: 13 years<br>Females: 77%     | 5 individual sessions of 60-90 minutes + daily practice (10 minutes twice a day)                                               | Hypnotherapy<br>Progressive muscular relaxation | 12 weeks<br>9-month follow-up | Depression (RCADS-25)<br>Anxiety (RCADS-25)                           |
| Nidich (2009a)     | Breast cancer                            | n = 130 (randomized)<br>Mean age: 63.84 years<br>Females: 100% | 7 individual and group sessions of 60-90 minutes during 7 days + optional monthly booster sessions + daily practice            | Usual care                                      | 72 weeks<br>No follow-up      | HRQOL (FACT-B, SF-36)                                                 |
| Nidich (2016)      | Male prison inmates with PTSD symptoms   | n = 181 (randomized)<br>Mean age: 29 years<br>Females: 0%      | 5 sessions of 60 minutes + daily individual practice (20 minutes, twice a day) + booster sessions during intervention period   | Usual care                                      | 16 weeks<br>No follow-up      | PTSD symptoms (TSC-40) and Anxiety subscale<br>Perceived stress (PSS) |
| Nidich (2017)      | Female prison inmates with PTSD symptoms | n = 22 (randomized)<br>Mean age: 45 years<br>Females: 100%     | 2 individual sessions of 20 minutes, twice a day + group sessions of 30-40 minutes twice a week during intervention period     | Waiting list                                    | 16 weeks<br>No follow-up      | PTSD symptoms (PCL-C)                                                 |
| Nidich (2018)      | Veterans with PTSD symptoms              | n = 203 (randomized)<br>Mean age: 47 years<br>Females: 17%     | 12 group sessions of 90 minutes during 12 weeks + daily practice (40 minutes a day)                                            | Prolonged exposure<br>Health education          | 12 weeks<br>No follow-up      | PTSD symptoms (CAPS, PCL-M)<br>Depression (PHQ-9)<br>Mood (POMS)      |

|                  |                                 |                                                             |                                                                                                                                               |                                                                     |                                       |                       |
|------------------|---------------------------------|-------------------------------------------------------------|-----------------------------------------------------------------------------------------------------------------------------------------------|---------------------------------------------------------------------|---------------------------------------|-----------------------|
| Raskin (1980)    | Students with anxiety           | n = 37 (randomized)<br>Mean age: 34 years<br>Females: 74.2% | 4 consecutive days + weekly booster sessions + daily practice (20 minutes, twice a day)                                                       | Relaxation                                                          | 6 weeks<br>3-6-12-18 months follow-up | Anxiety (TMAS, CMCL)  |
| Rees (2013)      | War refugees with PTSD symptoms | n = 42 (randomized)<br>Mean age: 32 years<br>Females: 62%   | 2 individual sessions of 60 and 90 minutes + 3 group sessions of 120 minutes + weekly optional booster sessions                               | Waiting list                                                        | 4 weeks<br>19-weeks follow-up         | PTSD symptoms (PCL-C) |
| Schneider (2012) | Hypertension                    | n = 213 (randomized)<br>Mean age: 59 years<br>Females: 42%  | 6 individual and group sessions of 90-120 minutes + maintenance sessions during intervention period + daily practice (20 minutes twice a day) | Health education                                                    | 5.4 years (average)<br>No follow-up   | Depression (CES-D)    |
| Tuab (1994)      | Alcohol use disorder            | n = 118 (randomized)<br>Mean age: 44.3 years<br>Females: 0% | 20 sessions of 60-90 minutes + daily practice (20 minutes, twice a day)                                                                       | Usual care + biofeedback<br>Usual care + neurotherapy<br>Usual care | 24 weeks                              | Substance consumption |

| Non-clinical population |                                                                         |                                                               |                                                                                                                           |                                           |                               |                                                                                     |
|-------------------------|-------------------------------------------------------------------------|---------------------------------------------------------------|---------------------------------------------------------------------------------------------------------------------------|-------------------------------------------|-------------------------------|-------------------------------------------------------------------------------------|
| Author (year)           | Population                                                              | Sample                                                        | Intervention                                                                                                              | Comparator                                | Duration and follow-up        | Outcomes                                                                            |
| Alexander (1989)        | Elderly people in retirement homes or nursing homes                     | n = 77 (randomized)<br>Mean age: 81 years<br>females: 82%     | Individual sessions of 20 minutes; twice a day.                                                                           | Mindfulness<br>Relaxation<br>Waiting list | 13 weeks<br>No follow-up      | Anxiety (STAI)<br>Depression (SDS)                                                  |
| Dillbeck (1977)         | College students                                                        | n = 33 (randomized)<br>Mean age: 21.7 years<br>females: 21%   | 4 sessions of 90 minutes during 4 days + daily practice (15-20 minutes/day)                                               | Usual care                                | 2 weeks<br>No follow-up       | Anxiety (STAI)                                                                      |
| Elder (2014)            | Employees in a therapeutic school for children with behavioral problems | n = 40 (randomized)<br>Mean age: 36 years<br>females: 52%     | 2 individual sessions + 3 group sessions + daily practice (15-20 minutes/day)                                             | Waiting list                              | 12 weeks<br>No follow-up      | Depression (MHI-5)<br>Perceived stress (PSS)<br>Burnout (MBI)                       |
| Leach (2015)            | Community-dwelling dementia caregivers                                  | n = 17 (randomized)<br>Mean age: 66 years<br>females: 88%     | 12 sessions (14 hours overall)                                                                                            | Waiting list                              | 12 weeks<br>4-month follow-up | HRQOL (AqOL-8D)<br>Anxiety (WebNeuro)<br>Depression (WebNeuro)<br>Stress (WebNeuro) |
| Nidich (2009b)          | College students                                                        | n = 298 (randomized)<br>Mean age: 25.5 years<br>females: 60%  | 7-step course with individual and group sessions + individual booster sessions + daily practice (20 minutes, twice a day) | Waiting list                              | 12 weeks<br>No follow-up      | Anxiety (POMS)<br>Depression (POMS)<br>Stress (POMS)                                |
| Ottens (1975)           | College students                                                        | n = 54 (randomized)<br>Mean age: 21.7 years<br>Females: 42.6% | 10 weeks of intervention + daily practice                                                                                 | Self-control<br>No treatment              | 10 weeks<br>No follow-up      | Tobacco consumption                                                                 |

|                          |           |                                                                        |                                                                                                                   |                                            |                              |                                     |
|--------------------------|-----------|------------------------------------------------------------------------|-------------------------------------------------------------------------------------------------------------------|--------------------------------------------|------------------------------|-------------------------------------|
| Sheppard (1997)          | Employees | n = 44 (randomized)<br>mean age: 50.5 years<br>Ratio male-female: 0.85 | 2 weekly sessions of 60 minutes during 12 weeks + daily practice (20 minutes twice a day)                         | Active control (Stress management program) | 12 weeks<br>3-year follow-up | Anxiety (STAI)<br>Depression (IPAT) |
| So (2001)a<br>Substudy 1 | Students  | n = 154 (randomized)<br>Mean age: 16.6 years<br>Females: 55.4%         | 15-20 minutes, twice a day                                                                                        | No intervention                            | 24 weeks<br>No follow-up     | Anxiety (STAI)                      |
| So (2001)b<br>Substudy 2 | Students  | n = 118 (randomized)<br>Mean age: 14.6 years<br>Females: 100%          | 15-20 minutes, twice a day                                                                                        | No intervention                            | 24 weeks<br>No follow-up     | Anxiety (STAI)                      |
| So (2001)c<br>Substudy 3 | Students  | n = 99 (randomized)<br>Mean age: 17.8 years<br>Females: 0%             | 15-20 minutes, twice a day                                                                                        | No intervention                            | 48 weeks<br>No follow-up     | Anxiety (STAI)                      |
| Travis (2018)            | Employees | n = 96 (randomized)<br>Mean age: 45.8 years<br>Females: 80%            | 5 individual and group sessions of 90 minutes for 5 consecutive days + weekly group reunions to share experiences | Waiting list                               | 5 days<br>4-mont follow-up   | Anxiety (POMS)<br>Depression (POMS) |
| Zuroff (1978)            | Students  | n = 60 (randomized)<br>Mean age: N.I.<br>Females: 50%                  | 5 group sessions of 60 minutes + 1 individual session of 60 minutes                                               | Muscular relaxation<br>No treatment        | 9 weeks<br>2-week follow-up  | Anxiety (ACL; S-R; BAM)             |

#### MANTRA-BASED MEDITATION

| <i>Clinical population</i> |                             |                                                               |                                                                                             |                            |                               |                                                                                      |
|----------------------------|-----------------------------|---------------------------------------------------------------|---------------------------------------------------------------------------------------------|----------------------------|-------------------------------|--------------------------------------------------------------------------------------|
| Author (year)              | Population                  | Sample                                                        | Intervention                                                                                | Comparator                 | Duration and follow-up        | Outcomes                                                                             |
| Bormann (2006)             | HIV-AIDS                    | n = 93 (randomized)<br>Mean age: 42.9 years<br>Females: 19.4% | 5 sessions of 90 minutes during 5 weeks + phone calls for 4 weeks + one final group session | Group educational sessions | 10 weeks<br>3-month follow-up | Anxiety (STAI)<br>Depression (CES-D)<br>Perceived stress (PSS)                       |
| Bormann (2008)             | Veterans with PTSD symptoms | n = 29 (randomized)<br>Mean age: 56 years<br>Females: 0%      | One weekly group session of 90 minutes during 6 weeks + usual care                          | Usual care                 | 6 weeks<br>No follow-up       | PTSD symptoms (CAPS, PTSD check-list)<br>Distrés (BSI-18)                            |
| Bormann (2013)             | Veterans with PTSD symptoms | n = 146 (randomized)<br>Mean age: 57 years<br>Females: 2.73%  | One weekly group session of 90 minutes during 6 weeks + usual care                          | Usual care                 | 12 weeks<br>6-weeks follow-up | PTSD symptoms (CAPS, PCL)<br>Anxiety and depression (BSI-18)<br>HRQOL (SF-12)        |
| Bormann (2018)             | Veterans with PTSD symptoms | n = 173 (randomized)<br>Mean age: 48.9 years<br>Females: 15%  | 8 individual sessions of 60 minutes, one per week                                           | Present-centered therapy   | 9 weeks<br>2-month follow-up  | PTSD symptoms (CAPS, PCLM)<br>Insomnia (ISI)<br>Depression (PHQ-9)<br>HRQOL (WHOQOL) |

|                                 |                                                      |                                                                  |                                                                                                                                 |                                                                                                             |                              |                                                                                                  |
|---------------------------------|------------------------------------------------------|------------------------------------------------------------------|---------------------------------------------------------------------------------------------------------------------------------|-------------------------------------------------------------------------------------------------------------|------------------------------|--------------------------------------------------------------------------------------------------|
| Jeitler (2015)                  | Chronic neck pain                                    | n = 89 (randomized)<br>Mean age: 50 years<br>Females: 82%        | Group weekly sessions of 15-30 minutes + 45 minutes of individual meditation + daily practice (15-30 minutes per day)           | Stretching                                                                                                  | 8 weeks<br>No follow-up      | HRQOL (SF-36)<br>Depression (CES-D)<br>Anxiety (STAI)<br>Perceived stress (PSS)                  |
| Kirsch (1979)                   | Students with public speaking anxiety                | n = 38 (randomized)<br>Mean age: N.I.<br>Females: N.I.           | Exploratory session about the problem + treatment description + Benson relaxation <sup>1</sup>                                  | Systematic desensitization<br>Systematic desensitization replacing relaxation with meditation<br>Stretching | 5 weeks                      | Anxiety (PRCS)                                                                                   |
| Lehrer (1983)                   | Anxiety                                              | n = 61<br>Mean age: N.I.<br>Females: N.I.                        | 5 weekly individual and group sessions of 90 minutes                                                                            | <i>Progressive muscular relaxation</i><br>Waiting list                                                      | 5 weeks<br>4-month follow-up | Anxiety (STAI, IPAT, LWASQ)<br>Psychopathology (SCL-90)                                          |
| Michalsen (2016)                | Chronic lower-back pain                              | n = 68 (randomized)<br>Mean age: 55 years<br>Females: 75%        | One group weekly session of 90 minutes of Jyoti meditation <sup>2</sup> during 8 weeks + daily practice (20-30 minutes per day) | Physical exercise                                                                                           | 8 weeks<br>No follow-up      | Perceived stress (PSS)<br>Anxiety (HADS)<br>Depression (HADS)<br>HRQOL (SF-36)<br>Adverse events |
| Parker (1978)                   | Alcohol use disorder and anxiety                     | n = 30 (randomized)<br>Mean age: 45.1 years<br>Females: 0%       | Group sessions of 30 minutes, 3 times per week                                                                                  | <i>Progressive muscular relaxation</i><br>Rest                                                              | 3 weeks<br>No follow-up      | Anxiety (STAI)                                                                                   |
| Puryear (1976)                  | Volunteers                                           | n = 159 (randomized)<br>Mean age: 38.35 years<br>Females: 69.18% | 3h meditation training + daily practice (20 minutes per day) during 28 days                                                     | No intervention                                                                                             | 28 days<br>No follow-up      | Anxiety (IPAT)                                                                                   |
| Vaccarino (2013)                | Metabolic syndrome                                   | n = 68 (randomized)<br>Mean age: 51.8 years<br>Females: 78.95%   | 4 group sessions of 60-90 minutes during 4 consecutive days + 17 booster sessions + daily practice (20 minutes, twice a day)    | Health education                                                                                            | 12 weeks<br>No follow-up     | Anxiety (STAI)<br>Perceived stress (PSS)<br>Depression (BDI-II)                                  |
| Vasudev (2016)<br>Ionson (2019) | Elderly people with low to moderate major depression | n = 95 (randomized)<br>Mean age: 68.9 years<br>Females: 68.7%    | Group sessions of 120 minutes, 4 times a week + 11 booster sessions of 60 minutes                                               | Usual care                                                                                                  | 12 weeks<br>No follow-up     | Depression (HAM-D, GDS)<br>Anxiety (GAI)<br>HRQOL (QOLSV)<br>Adverse events (TSes)               |
| Wachholtz (2005)                | Students                                             | n = 68 (randomized)<br>Mean age: 19.13 years<br>Females: 32%     | Individual and group sessions of 20 minutes during 2 weeks                                                                      | Secular mantra<br>Relaxation                                                                                | 2 weeks<br>No follow-up      | Anxiety (STAI)                                                                                   |
| Wachholtz (2008)                | Students with migraine                               | n = 92 (randomized)<br>Mean age: 19.1<br>Females: 90%            | Initial session (1 hour) and election of meditation phrases + daily practice (20 minutes per day)                               | Internal secular mantra<br>External secular mantra<br>Relaxation                                            | 4 weeks<br>No follow-up      | Anxiety (STAI)<br>Depression (CES-D)<br>HRQOL (MSQOL)                                            |

| <i>Non-clinical population</i> |                                |                                                                   |                                                                                                         |                                                                      |                                     |                                                                                |
|--------------------------------|--------------------------------|-------------------------------------------------------------------|---------------------------------------------------------------------------------------------------------|----------------------------------------------------------------------|-------------------------------------|--------------------------------------------------------------------------------|
| Author (year)                  | Population                     | Sample                                                            | Intervention                                                                                            | Comparator                                                           | Duration and follow-up              | Outcomes                                                                       |
| Anderson (1999)                | Teachers                       | n = 91 (randomized)<br>Age (range): 22-60 years<br>Females: 84.6% | Weekly sessions of 90 minutes + daily practice (20 minutes, twice a day) + one monthly booster sessions | Waiting list                                                         | 5 weeks<br>9-week follow-up         | Anxiety (STAI)<br>Burnout (MBI)<br>Occupational stress (TSI)                   |
| Boswell (1979)                 | Students with anxiety symptoms | n = 80 (randomized)<br>Mean age: N.I.<br>Females: 80%             | 15-minutes sessions, twice a day, during 2 weeks                                                        | Placebo<br><i>Progressive muscular relaxation</i><br>No intervention | 2 weeks<br>No follow-up             | Anxiety (STAI)                                                                 |
| Dunne (2019)                   | Emergency workers              | n = 51 (randomized)<br>Mean age: N.I.<br>Females: N.I.            | 4 group sessions (4h/session) during 7 weeks + daily practice (20 minutes, twice a day) during 7 days   | No intervention                                                      | 8 weeks<br>2-month follow-up        | Burnout (MBI)<br>Anxiety (DASS-21)<br>Depression (DASS-21)<br>Stress (DASS-21) |
| Heide (1980)                   | Students                       | n = 63 (randomized)<br>Mean age: N.I.<br>Females: 39.65%          | 1 group session of 60 minutes + daily practice (20 minutes, twice a day) during 7 days                  | No intervention                                                      | 1 week<br>No follow-up              | Anxiety (STAI)                                                                 |
| Kirkland (1980)                | Students                       | n = 60 (randomized)<br>Mean age: N.I.<br>Females: N.I.            | 5 group sessions of 90 minutes                                                                          | Skills-acquisition<br>Relaxation<br>No intervention                  | 5 days<br>No follow-up              | Anxiety (CSAQ-C)                                                               |
| Manocha (2011)                 | Employees                      | n = 180 (randomized)<br>Mean age: 42 years<br>Females: N.I.       | 4 sessions of 60 minutes, twice a week during 8 weeks + daily practice (10-20 minutes, twice a day)     | Relaxation<br>Waiting list                                           | 8 weeks<br>No follow-up             | Anxiety (STAI)<br>Depression (POMS)<br>Stress (PSQ)                            |
| Murphy (1986)                  | Alcohol use disorder           | n = 60 (randomized)<br>Age (range): 21-30 years<br>Females: 0%    | Group sessions three days per week + daily practice (20 minutes, twice a day)                           | Physical exercise<br>No treatment                                    | 8 weeks<br>6-weeks follow-up        | Alcohol consumption                                                            |
| Oman (2006)                    | Healthcare professionals       | n = 61<br>Mean age: N.I.<br>Females: 86%                          | 8 sessions of 120 minutes, once a week during 8 weeks                                                   | Waiting list                                                         | 8 weeks<br>8-and 19-weeks follow-up | Perceived stress (PSS)<br>Burnout (MBI)<br>HRQOL (MOS)                         |
| Severtsen (1986)               | Nursing students               | n = 10<br>Mean age: 25.3 years<br>Females: 100%                   | Daily practice (15-20 minutes per day during 7 weeks)                                                   | Physical exercise (aerobic)                                          | 7 weeks<br>No follow-up             | Perceived stress (HRSRS, SUSLT)                                                |
| Wolf (2003)                    | General population             | n = 93 (randomized)<br>Mean age: 24.7 years<br>Females: 50.8%     | Daily sessions of 20-25 minutes during 28 days                                                          | Placebo<br>No intervention                                           | 4 weeks<br>No follow-up             | Depression (GCS)<br>Stress (ICS)                                               |

| MIXED MEDITATIONS |                                               |                                                                 |                                                                                                                                                                                                         |              |                               |                                                             |
|-------------------|-----------------------------------------------|-----------------------------------------------------------------|---------------------------------------------------------------------------------------------------------------------------------------------------------------------------------------------------------|--------------|-------------------------------|-------------------------------------------------------------|
| Author (year)     | Population                                    | Sample                                                          | Intervention                                                                                                                                                                                            | Comparator   | Duration and follow-up        | Outcomes                                                    |
| Milbury (2013)    | Breast cancer patients with cognitive decline | n = 46 (randomized)<br>Mean age: 56.3 years<br>Females: 100%    | Mantra-based meditation + Tibetan sound + focused attention on breathing<br><br>Two 60-minutes sessions per week during 6 weeks<br><br>Lecture and reflexion on a buddist text + spiritual mantra + LKM | Waiting list | 6 weeks<br>No follow-up       | Depression (CES-D)<br>HRQOL (SF-36)<br>Sleep quality (PSQI) |
| Wu (2019)         | Adult employees                               | n = 122 (randomized)<br>Mean age: 46.57 years<br>Females: 71.3% | 6 sessions of 3 hours + 2 week-end retire                                                                                                                                                               | Waiting list | 13 weeks<br>3-month follow-up | Perceived stress (PSS)<br>Psychopathology (GHQ)             |

<sup>1</sup> Benson relaxation: Benson's relaxation uses a mantra-like prayer or the repetition of secular phrases along with attention to the breath with the aim of inducing a deep state of relaxation.

<sup>2</sup> Jyoti meditation: In Jyoti meditation, participants choose a mantra with spiritual meaning, close their eyes, and shift attention from thoughts to a centered point behind and between the two eyebrows

ACL: Adjective Check List scale of anxiety; AqoL-8D: Assessment of Quality of Life 8-dimension; BAI: Beck Anxiety Inventory; BAM: Behavioral Anxiety Measure; BDI-II: Beck Depression Inventory II; BSI-18: Brief Symptom Inventory-18; CAPS: Clinician-Administered PTSD Scale; CES-D: Center for Epidemiologic Studies Depression Scale; CMCL: State Anxiety - Current Mood Checklist; CPSR: Composite Primary IBS Symptom Reduction; CSAQ-C: Cognitive scale of the Cognitive-Somatic Anxiety Questionnaire; DASS-21: depression, Anxiety and Stress Scale; DSM-III: Diagnostic and Statistical Manual of Mental Disorders, version III; FACT-B: Functional Assessment of Cancer Therapy–Breast; GAI: Geriatric Anxiety Inventory; GCS: Generalized Contentment Scale; GDS: Geriatric Depression Scale; GHQ: General Health Questionnaire; HADS: Hospital Anxiety Depression Scale; HAM-D: Hamilton Depression Rating Scale; HRSD: Hamilton Rating Scale for Depression; HRSRS: Holmes-Rahe Social Readjustment Scale; ICS: Index of Clinical Stress; IPAT: Institute of Personality and Ability Testing Depression Scale; ISI: Insomnia Severity Index; LWASQ: Lehrer-Woolfolk Trimodal Anxiety Symptom Questionnaire; MBI: Maslach Burnout Inventory; MHI-5: Mental Health Inventory-5; MOS: Medical Outcomes Study; MSQOL: Migraine Specific Quality of Life Scale; N.I.: No information; PCL-5: PCL-S PTSD Checklist – Specific; PCL-C: PTSD Checklist-Civilian Version; PCL-M: PTSD Checklist–Military Version; PHQ-9: Patient Health Questionnaire-9; POMS: Profile of Mood States Total Mood Disturbance scale; PRCS: Personal Report of Confidence as a Speaker; PSQ: Psychological Strain Questionnaire; PSQI: Pittsburgh Sleep Quality Index; PSS: Perceived Stress Scale; PTSD: Posttraumatic stress disorder; QOLSV: Quality of Life Profile Seniors Version; RCADS-25: Revised Children's Anxiety and Depression Scale-25; SCL-90: Symptom Checklist-90; SDS: Symptom Distress Scale; SF-12: Short Form-12 Health Survey; SF-36: Short Form-36 Health Survey; S-R: Inventory of Anxiousness; SRDS: Self-Rating Depression Scale; STAI: State-Trait Anxiety Inventory; SUSLT: Stanford University Stress Level Test; TMAS: Taylor Manifest Anxiety Scale; TSC-40: Trauma Symptom Checklist – 40; TSES: Toronto Side Effects Scale; TSI: Teacher's Stress Inventory; WHOQOL: World Health Organization Quality of Life brief form
