# Supplementary material for: Effectiveness of Mantra-Based Meditation on Mental Health: A Systematic Review and Meta-Analysis
Source: MDPI journal article supplement (doi:10.3390/ijerph19063380), 2022-03-13

## Subgroup analysis for Stress: Meditation versus control group

Figure S14: Type of control used

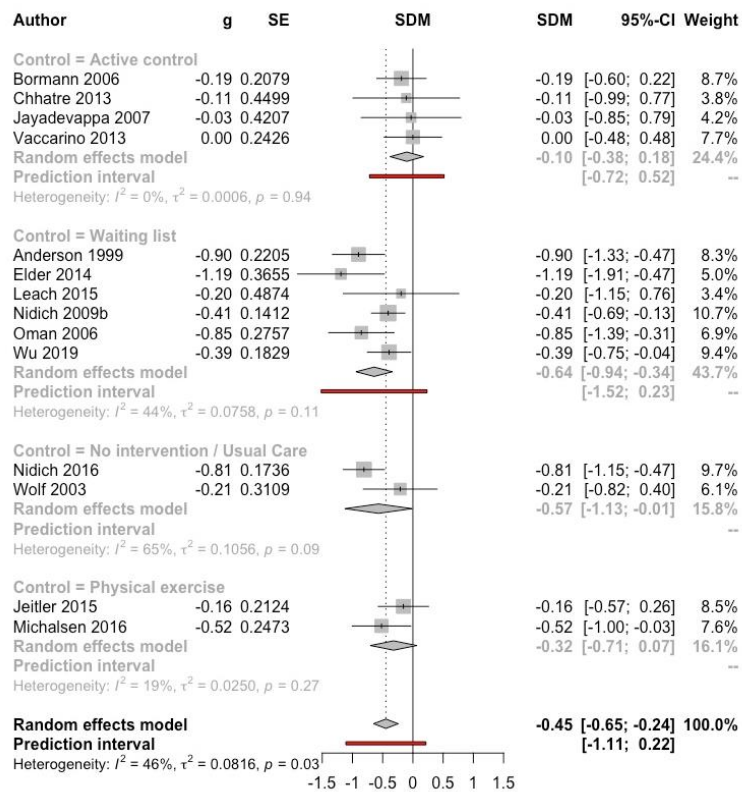

Figure S15: Type of population

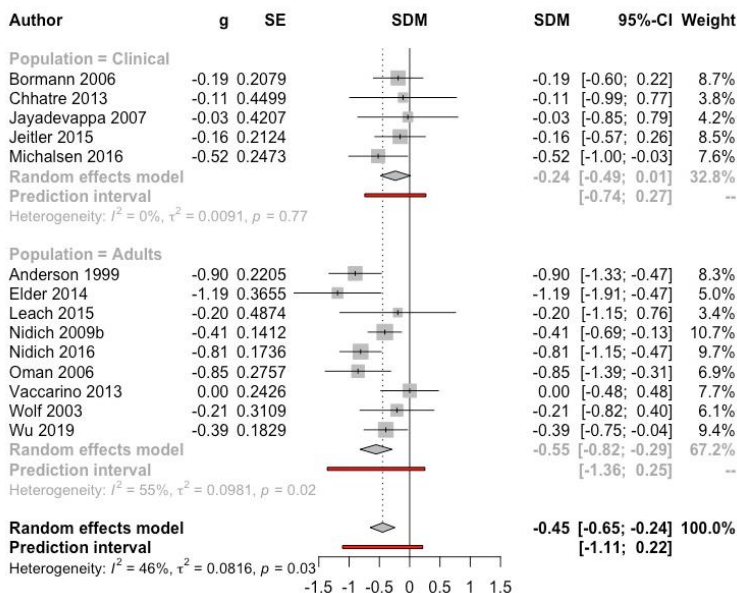

**Figure S16: Length of follow up**

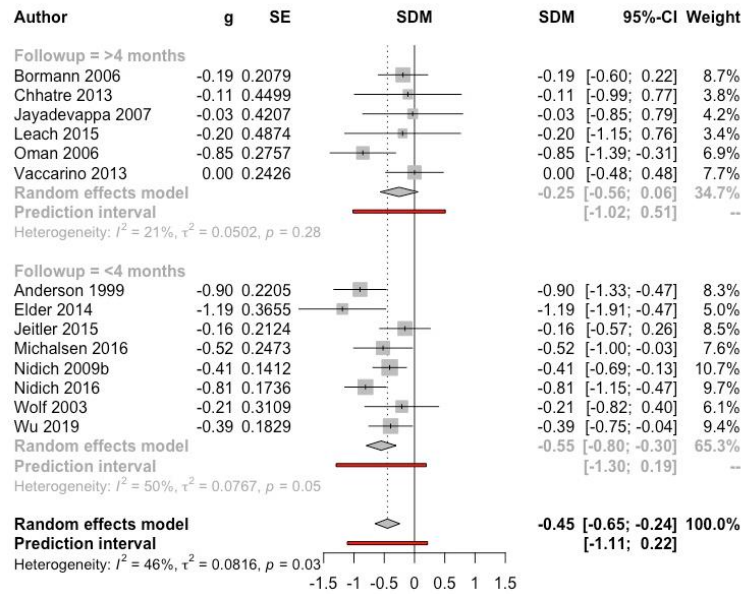

**Figure S17: Year of publication**

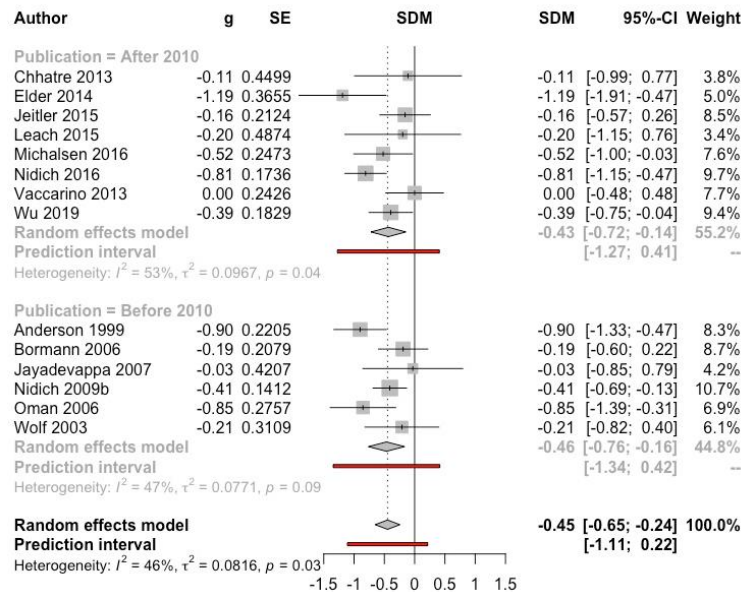

Supplement: s1 [file s1]
