# Supplementary material for: Effectiveness of Mantra-Based Meditation on Mental Health: A Systematic Review and Meta-Analysis
Source: MDPI journal article supplement (doi:10.3390/ijerph19063380), 2022-03-13

**Risk of publication Bias**

*Figure S1: Anxiety – Meditation vs control*

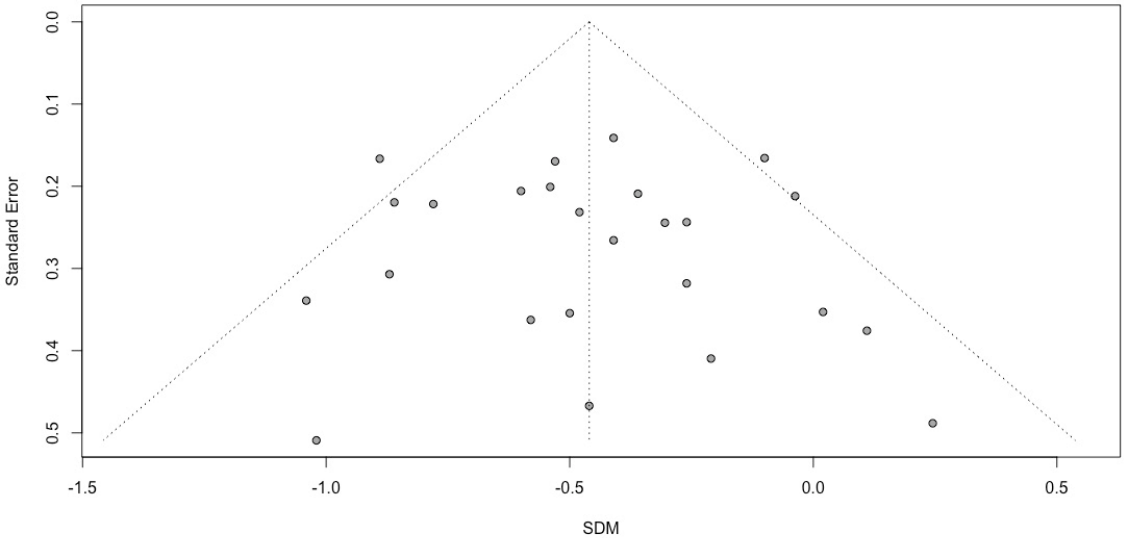

*Figure S2: Depression – Meditation vs control*

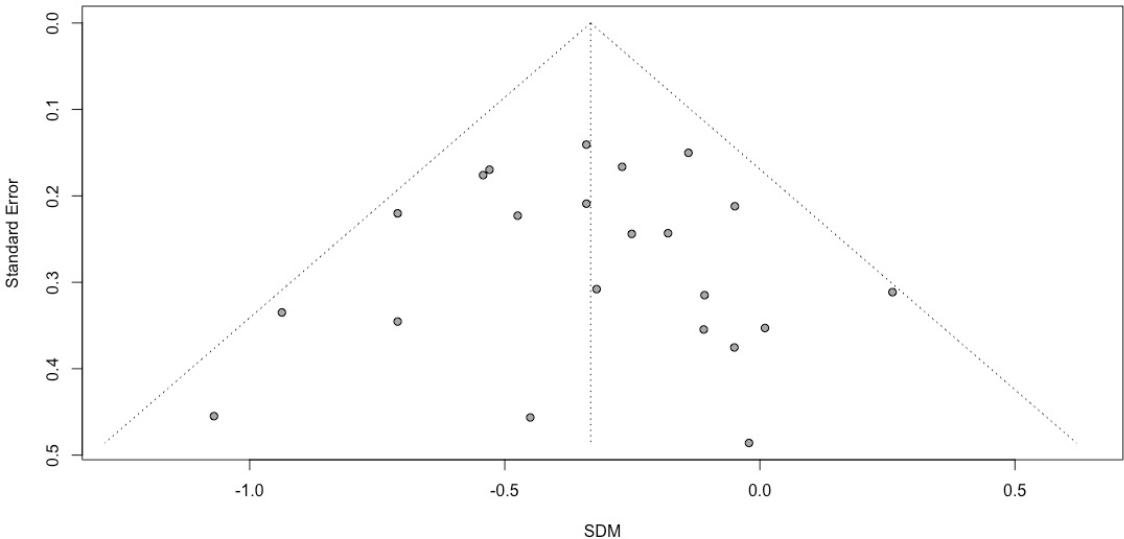

*Figure S3: Stress – Meditation vs control*

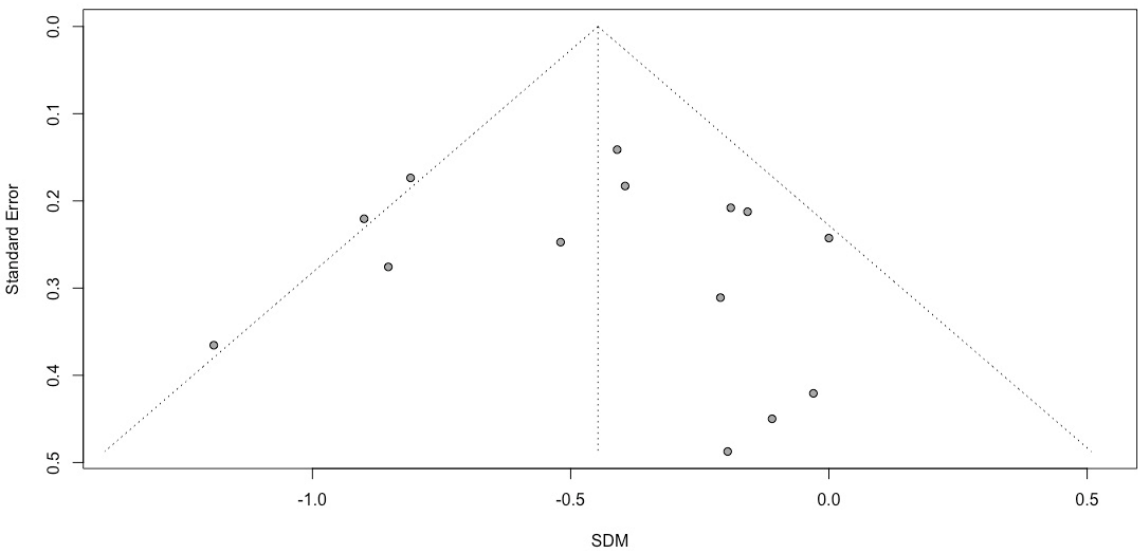

**Figure S4: Mental quality of life – Meditation vs control**

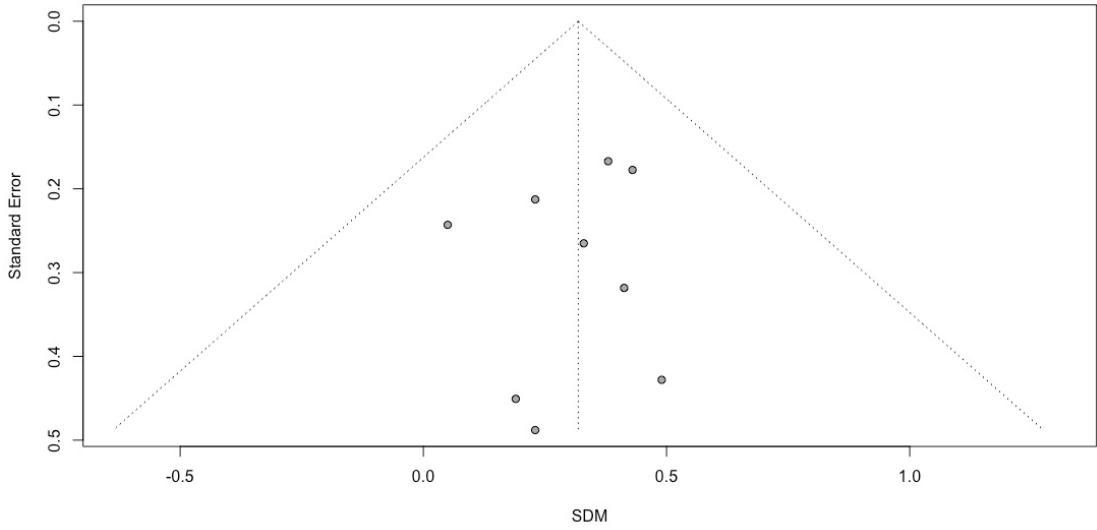

Supplement: s1 [file s1]
