# Supplementary material for: Effectiveness of Mantra-Based Meditation on Mental Health: A Systematic Review and Meta-Analysis
Source: MDPI journal article supplement (doi:10.3390/ijerph19063380), 2022-03-13

## Subgroup analysis for Depression: Meditation versus control group

**Figure S9: Differences between the studies that reported change and follow-up data**

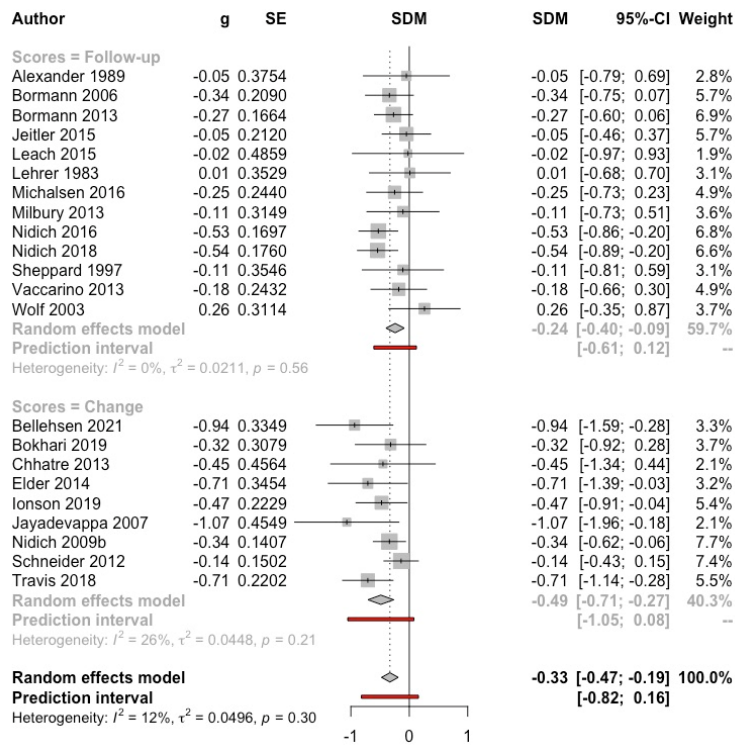

**Figure S10: Type of control used**

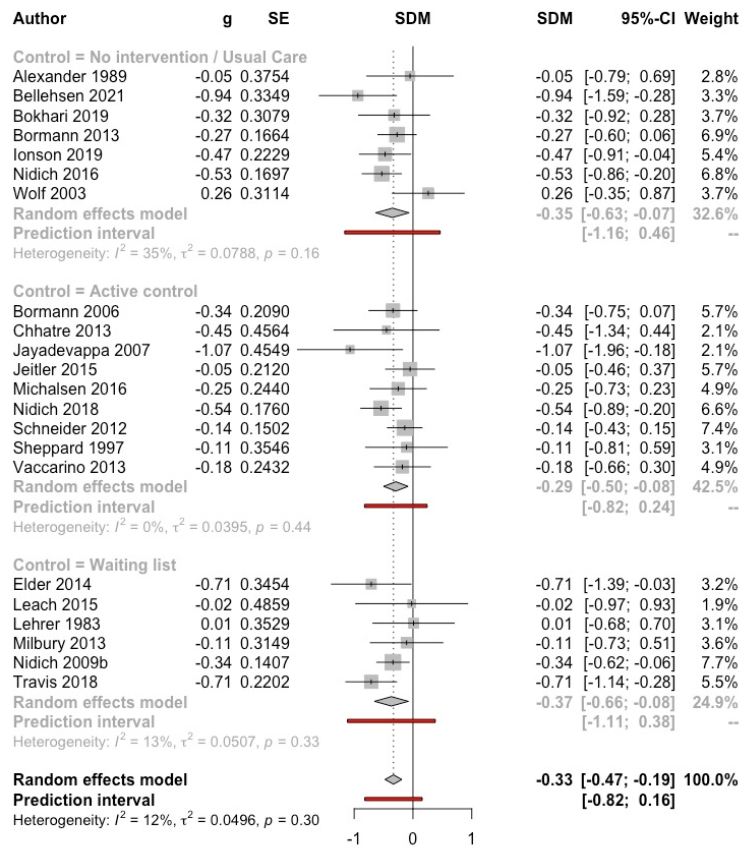

**Figure S11: Type of population**

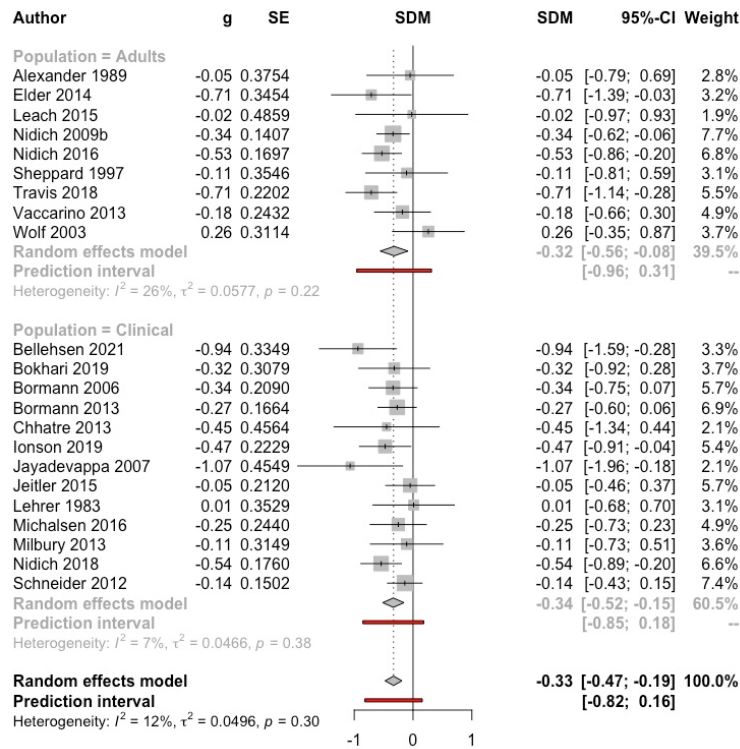

**Figure S12: Year of publication**

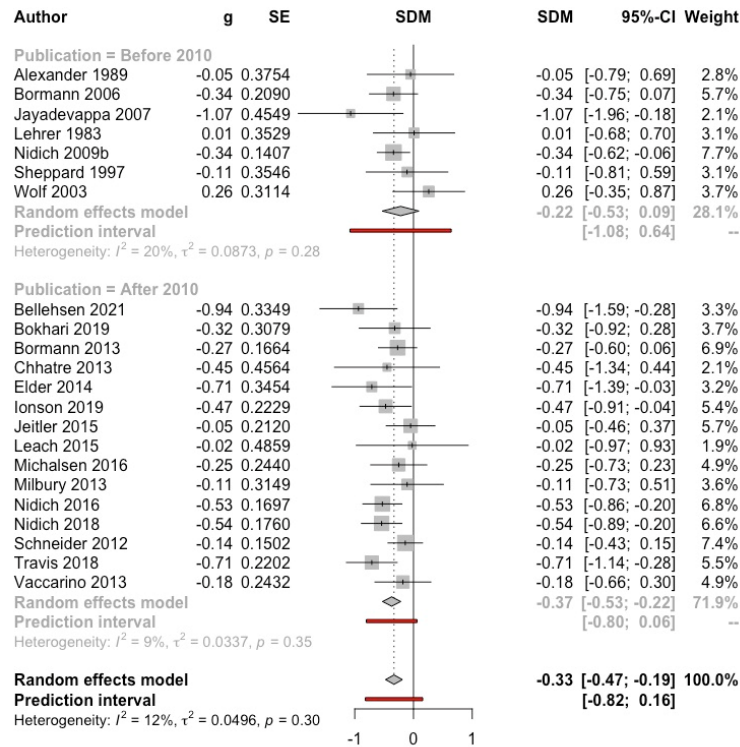

**Figure S13: Length of follow up**

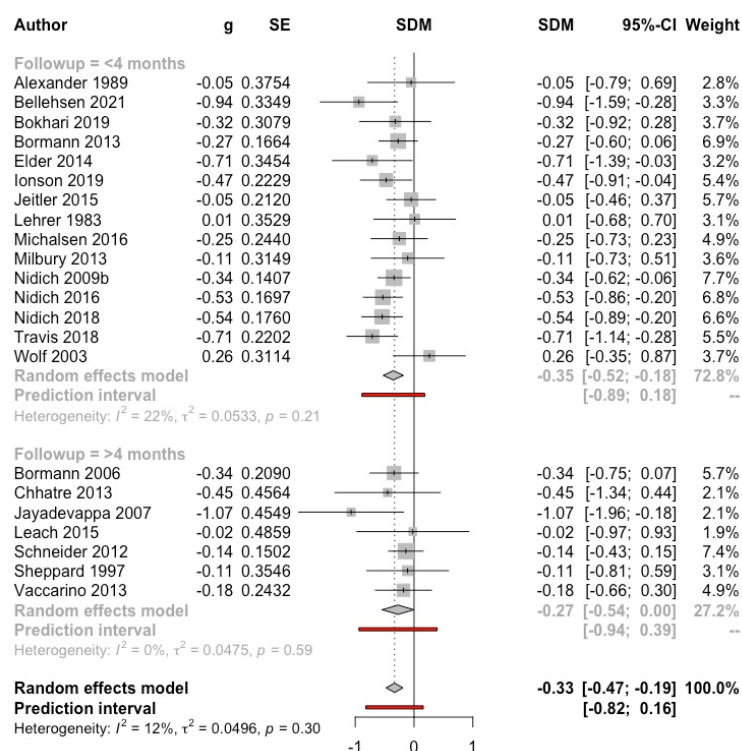

Supplement: s1 [file s1]
