# Supplementary material for: Effectiveness of Mantra-Based Meditation on Mental Health: A Systematic Review and Meta-Analysis
Source: Int J Environ Res Public Health. 2022 Mar 13;19(6):3380. doi: 10.3390/ijerph19063380 (PMC8949812; doi:10.3390/ijerph19063380)
Supplement: Supplementary file 1 [file ijerph-19-03380-s001.zip]

Archive with 9 entries (9 files):
- Figures S14¿CS17.pdf
- Figures S18-S20.pdf
- Figures S1¿CS4.pdf
- Figures S5¿CS8.pdf
- Figures S9¿CS13.pdf
- Table S1.pdf
- Table S2.pdf
- Table S3.pdf
- Table S4.pdf
